# Supplementary material
Source: PubMed Central journal article supplement (PMC2585513)
Supplement: NIHMS48774-supplement-supplementary.pdf [file NIHMS48774-supplement-supplementary.pdf]

**Supplementary Fig. 1.** Selected bands for in-gel digestion in anti-OmcA and anti-MtrC IP of unlabeled cell lysates.

**Supplementary Fig. 2.** Protein mass distribution in *S. oneidensis* MR-1 cells. Genome database (4,854 ORFs) was downloaded from The Institute for Genomic Research (TIGR) (<http://www.tigr.org/>).

**Supplementary Fig. 3.** SDS-PAGE analysis of the proteins immunoprecipitated with anti-OmcA and anti-MtrC from *mtrC* and *omcA* mutant cells *in vivo* cross-linked by DSS and MRN. IP of uncross-linked mutant cells served as a control.

**Supplementary Fig. 4.** SDS-PAGE analysis of the proteins immunoprecipitated with anti-OmcA from cell lysates cross-linked by DSS or MRN. IP of uncross-linked cells served as a control.

**Supplementary Table I** Protein identifications of selected bands in anti-OmcA and anti-MtrC IP of unlabeled cell lysates.

**Supplementary Table II.** Peptide details for all identified proteins.

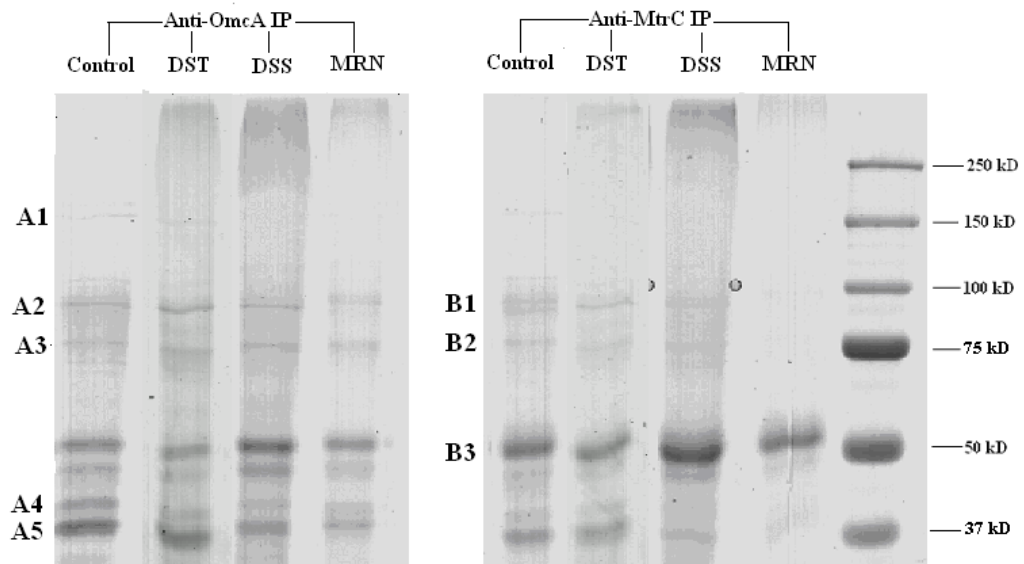

**Supplementary Fig. 1**

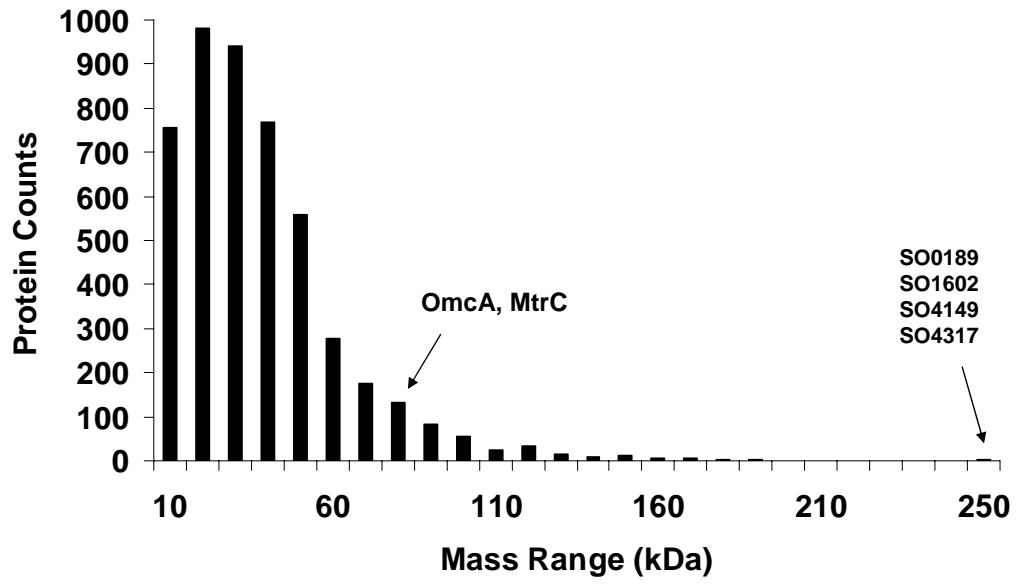

Supplementary Fig. 2

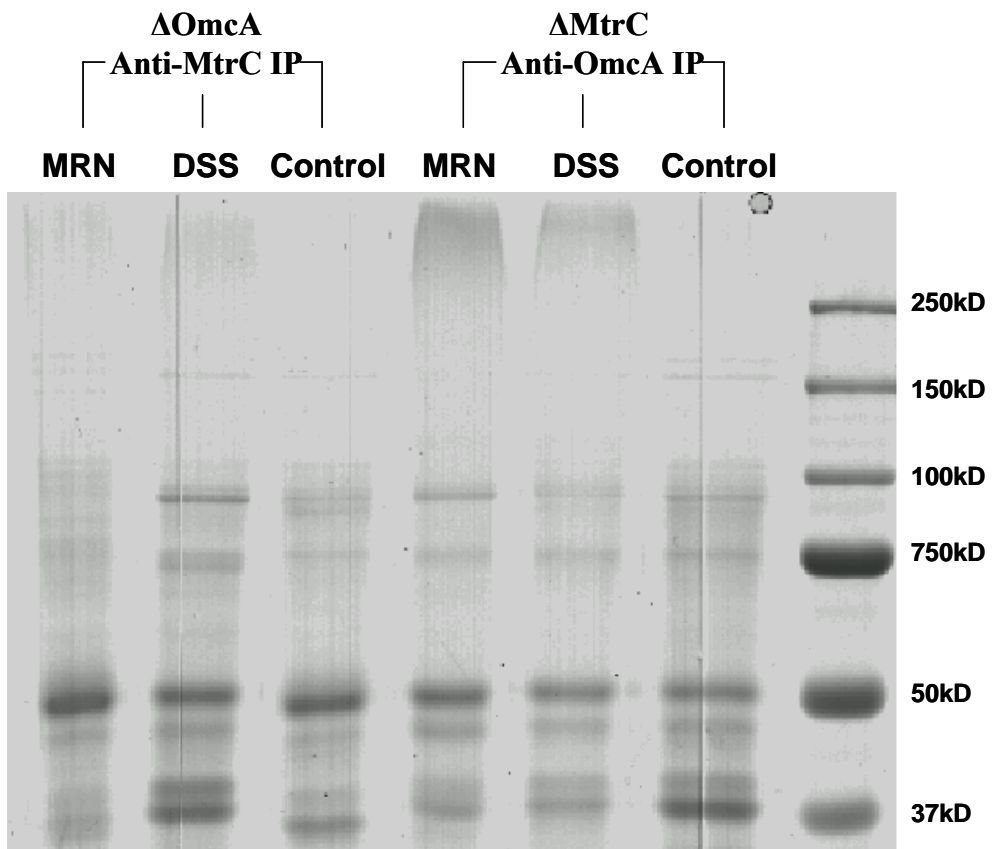

Supplementary Fig. 3

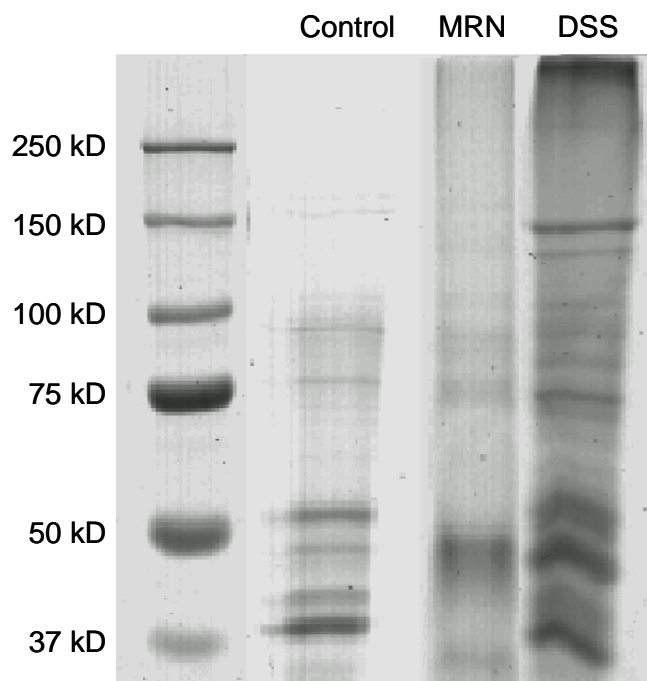

**Supplementary Fig. 4**

## Supplementary Table I

**A1**

| Gene    | Mascot Score | Annotation                                      | Category <sup>a</sup> | MW (kDa) |
|---------|--------------|-------------------------------------------------|-----------------------|----------|
| SO0224  | 1067         | DNA-directed RNA polymerase, beta subunit, RpoB | C                     | 150      |
| SO0225  | 873          | DNA-directed RNA polymerase, beta subunit, RpoC | C                     | 156      |
| SOa0110 | 821          | lipoprotein, putative                           | OM                    | 146      |
| SO2593  | 86           | NAD-glutamate dehydrogenase family protein      | C                     | 183      |

**A2**

| Gene   | Mascot Score | Annotation                                        | Category <sup>a</sup> | MW (kDa) |
|--------|--------------|---------------------------------------------------|-----------------------|----------|
| SO0432 | 1250         | aconitate hydratase 2, AcnB                       | C                     | 94       |
| SO2427 | 1122         | TonB-dependent receptor                           | OM                    | 92       |
| SO0424 | 543          | pyruvate dehydrogenase, E1 component, AceE        | C                     | 100      |
| SO1429 | 474          | anaerobic dimethyl sulfoxide reductase            | OM                    | 92       |
| SO2907 | 396          | TonB-dependent receptor domain protein            | OM                    | 96       |
| SO1521 | 394          | respiratory FAD-dependent D-lactate dehydrogenase | C                     | 103      |
| SO3935 | 355          | ribonuclease R, Rnr                               | C                     | 91       |
| SO0781 | 216          | glycine dehydrogenase (decarboxylating), GcvP     | C                     | 105      |
| SO3193 | 214          | polysaccharide biosynthesis/export protein, OtnA  | OM                    | 100      |
| SO4692 | 209          | acridine efflux pump, AcrB/AcrD/AcrF family       | IM                    | 112      |
| SO2606 | 114          | PqiB family protein                               | IM                    | 93       |
| SO1482 | 106          | TonB-dependent receptor                           | OM                    | 90       |
| SO1637 | 96           | outer membrane protein assembly factor, YaeT      | OM                    | 92       |
| SO1174 | 66           | leucyl-tRNA synthetase, LeuS                      | C                     | 97       |
| SO3560 | 64           | subfamily M16B unassigned peptidases              | OM                    | 105      |

**A3**

| Gene   | Mascot Score | Annotation                                        | Category <sup>a</sup> | MW (kDa) |
|--------|--------------|---------------------------------------------------|-----------------------|----------|
| SO0021 | 1050         | fatty oxidation complex, alpha subunit, FadB      | C                     | 77       |
| SO1779 | 861          | Decaheme cytochrome c, OmcA                       | OM                    | 80       |
| SO1126 | 789          | chaperone protein, DnaK                           | C                     | 69       |
| SO3669 | 664          | TonB-dependent haem/haemoglobin receptor, HmuA    | OM                    | 76       |
| SO1776 | 588          | outer membrane protein, MtrB                      | OM                    | 76       |
| SO0314 | 539          | ornithine decarboxylase, SpeF                     | C                     | 82       |
| SO1209 | 466          | polyribonucleotide nucleotidyltransferase, PnpA   | C                     | 76       |
| SO0842 | 368          | translation elongation factor G, FusA_2           | C                     | 77       |
| SO2492 | 317          | oxidoreductase, acyl-CoA dehydrogenase family     | IM                    | 83       |
| SO3033 | 300          | ferric alcaligin siderophore receptor, FauA       | OM                    | 78       |
| SO4523 | 215          | TonB-dependent adherence-conferring protein, IrgA | OM                    | 73       |

|        |     |                                          |    |    |
|--------|-----|------------------------------------------|----|----|
| SO0425 | 200 | dihydrolipoamide acetyltransferase, AceF | C  | 70 |
| SO2912 | 208 | pyruvate formate-lyase, PflB             | C  | 85 |
| SO0228 | 154 | translation elongation factor G, Fusa_1  | C  | 77 |
| SO1894 | 119 | methylcrotonyl-CoA carboxylase, MccA     | C  | 76 |
| SO4743 | 82  | TonB-dependent receptor                  | OM | 76 |
| SO3844 | 73  | oligopeptidase lipoprotein, M13 family   | OM | 77 |

#### A4

| Gene   | Mascot Score | Annotation                                       | Category <sup>a</sup> | MW (kDa) |
|--------|--------------|--------------------------------------------------|-----------------------|----------|
| SO3545 | 1469         | OmpA family protein                              | OM                    | 40       |
| SO1821 | 467          | outer membrane porin                             | OM                    | 44       |
| SO0256 | 217          | DNA-directed RNA polymerase, alpha subunit, RpoA | C                     | 36       |
| SO4693 | 134          | type I secretion membrane fusion protein, HlyD   | OM                    | 40       |
| SO3896 | 109          | outer membrane porin, putative                   | OM                    | 40       |
| SO1164 | 56           | D-alanyl-D-alanine carboxypeptidase, DacA        | P                     | 43       |

#### A5

| Gene   | Mascot Score | Annotation                            | Category <sup>a</sup> | MW (kDa) |
|--------|--------------|---------------------------------------|-----------------------|----------|
| SO3896 | 7512         | Outer membrane porin, putative        | OM                    | 40       |
| SO3545 | 645          | OmpA family protein                   | OM                    | 40       |
| SO2929 | 76           | expressed protein of unknown function | C                     | 41       |

#### B1

| Gene   | Mascot Score | Annotation                                        | Category <sup>a</sup> | MW (kDa) |
|--------|--------------|---------------------------------------------------|-----------------------|----------|
| SO3935 | 1135         | ribonuclease R, Rnr                               | C                     | 91       |
| SO2427 | 566          | TonB-dependent receptor                           | OM                    | 92       |
| SO0432 | 483          | aconitate hydratase 2, AcnB                       | C                     | 94       |
| SO1930 | 393          | 2-oxoglutarate dehydrogenase, E1 component, SucA  | C                     | 105      |
| SO0424 | 327          | pyruvate dehydrogenase, E1 component, AceE        | C                     | 100      |
| SO1521 | 177          | respiratory FAD-dependent D-lactate dehydrogenase | C                     | 103      |
| SO3193 | 151          | polysaccharide biosynthesis/export protein, OtnA  | OM                    | 100      |
| SO2907 | 120          | TonB-dependent receptor domain protein            | OM                    | 96       |
| SO4211 | 117          | preprotein translocase ATPase subunit, SecA       | C                     | 103      |
| SO2411 | 62           | DNA gyrase subunit, GyrA                          | C                     | 102      |

#### B2

| Gene   | Mascot Score | Annotation                   | Category <sup>a</sup> | MW (kDa) |
|--------|--------------|------------------------------|-----------------------|----------|
| SO1126 | 490          | chaperone protein, DnaK      | C                     | 69       |
| SO1776 | 450          | outer membrane protein, MtrB | OM                    | 78       |
| SO1779 | 410          | Decaheme cytochrome c, OmcA  | OM                    | 80       |

|        |     |                                                 |    |    |
|--------|-----|-------------------------------------------------|----|----|
| SO3669 | 335 | TonB-dependent haem/haemoglobin receptor, HmuA  | OM | 76 |
| SO1778 | 332 | Decaheme cytochrome c, MtrC                     | OM | 72 |
| SO0314 | 291 | ornithine decarboxylase, SpeF                   | C  | 82 |
| SO0021 | 188 | fatty oxidation complex, alpha subunit, FadB    | C  | 77 |
| SO2402 | 178 | ribosomal protein S1, RpsA                      | C  | 61 |
| SO3844 | 141 | oligopeptidase lipoprotein, M13 family          | OM | 77 |
| SO3033 | 140 | ferric alcaligin siderophore receptor, FauA     | OM | 78 |
| SO2912 | 129 | pyruvate formate-lyase, PflB                    | C  | 85 |
| SO2492 | 128 | oxidoreductase, acyl-CoA dehydrogenase family   | IM | 84 |
| SO1209 | 124 | polyribonucleotide nucleotidyltransferase, PnpA | C  | 76 |
| SO4743 | 101 | TonB-dependent receptor                         | OM | 77 |
| SO3142 | 97  | peptidyl-dipeptidase, Dcp_1                     | OM | 80 |
| SO2629 | 76  | isocitrate dehydrogenase, NADP-dependent, Icd   | C  | 81 |

**B3<sup>b</sup>**

| Gene   | Mascot Score | Annotation                           | Category | MW (kDa) |
|--------|--------------|--------------------------------------|----------|----------|
| TRPGTR | 205          | Trypsin precursor                    |          | 25       |
| I46732 | 171          | IG gamma heavy chain constant region |          | 21       |
| GHRB   | 145          | IG gamma chain C region              |          | 36       |

<sup>a</sup>OM denotes outer membrane; P denotes periplasmic; IM denotes inner membrane; and C denotes cytoplasmic.

<sup>b</sup>B3 identification was performed using MSDB database with a mammalian taxonomy.





|               |                                  |     |    |      |  |        |         |         |       |   |    |          |                      |               |
|---------------|----------------------------------|-----|----|------|--|--------|---------|---------|-------|---|----|----------|----------------------|---------------|
|               |                                  |     |    |      |  | 660.30 | 1318.60 | 1318.68 | -0.08 | 0 | 29 | 0.039    | MIVVEEVLSR           | Oxidation (M) |
|               |                                  |     |    |      |  | 812.18 | 1622.35 | 1622.78 | -0.43 | 0 | 28 | 0.041    | YTNVVVDATEEQIK       |               |
|               |                                  |     |    |      |  | 726.27 | 2175.79 | 2176.08 | -0.29 | 0 | 78 | 4.7e-007 | SLDEQVTGHDLISEHEVR   |               |
| <b>SO4747</b> | ATP synthase F1, beta subunit    | 100 | 49 | 5.0  |  | 683.29 | 1364.57 | 1365.73 | -1.16 | 0 | 48 | 0.00021  | DVLLFVDNIYR          |               |
|               |                                  |     |    |      |  | 725.81 | 1449.61 | 1449.78 | -0.17 | 0 | 67 | 5.6e-006 | YTLAGTEVSAALLGR      |               |
| <b>SO0217</b> | Translation elongation factor Tu | 79  | 43 | 11.0 |  | 593.34 | 1184.66 | 1184.64 | 0.02  | 0 | 32 | 0.019    | VGDEVEIVGIR          |               |
|               |                                  |     |    |      |  | 950.16 | 1898.32 | 1899.00 | -0.68 | 0 | 39 | 0.0016   | ILELAALADSYIPEPER    |               |
|               |                                  |     |    |      |  | 726.97 | 2177.88 | 2178.10 | -0.22 | 0 | 53 | 0.00016  | DIDKPFLMPIEDVFSISGR  |               |
| <b>SO4749</b> | ATP synthase F1, alpha subunit   | 54  | 55 | 12.0 |  | 661.76 | 1321.50 | 1321.65 | -0.15 | 0 | 28 | 0.031    | IEQFEVVSER           |               |
|               |                                  |     |    |      |  | 722.24 | 1442.46 | 1442.77 | -0.31 | 0 | 36 | 0.004    | NEGTVIVSDGHR         |               |
|               |                                  |     |    |      |  | 928.69 | 1855.36 | 1855.86 | -0.50 | 0 | 30 | 0.024    | ELAAAFSQFASDLDDATR   |               |
|               |                                  |     |    |      |  | 765.95 | 2294.81 | 2294.13 | 0.69  | 0 | 27 | 0.057    | VGDFEALLSYMNSEHAALIK | Oxidation (M) |

#### Anti-MtrC IP / MRN

| Gene           | Annotation                       | Mascot_Score | MW (kDa) | Coverage | Observed m/z | Mr(expt) | Mr(calc) | Delta | Miss | Score | Expect   | Peptide                    | Var_Mod       |
|----------------|----------------------------------|--------------|----------|----------|--------------|----------|----------|-------|------|-------|----------|----------------------------|---------------|
| <b>SO1779</b>  | Decaheme cytochrome c, OmcA      | 811          | 79       | 31.00    | 468.28       | 934.55   | 934.49   | 0.06  | 0    | 39    | 0.004    | VPTSAFWK                   |               |
|                |                                  |              |          |          | 483.28       | 964.54   | 964.50   | 0.04  | 0    | 30    | 0.023    | AWLYGDIK                   |               |
|                |                                  |              |          |          | 537.32       | 1072.62  | 1072.63  | -0.01 | 0    | 69    | 3.7e-006 | FGIAQLTPVK                 |               |
|                |                                  |              |          |          | 543.79       | 1085.57  | 1085.62  | -0.05 | 0    | 91    | 2.1e-008 | SNVVTGIALGR                |               |
|                |                                  |              |          |          | 629.26       | 1256.50  | 1256.59  | -0.09 | 0    | 29    | 0.033    | EFISDPSAYTK                |               |
|                |                                  |              |          |          | 650.75       | 1299.48  | 1299.62  | -0.15 | 0    | 69    | 2.6e-006 | YAYIQDQPFPR                |               |
|                |                                  |              |          |          | 670.71       | 1339.40  | 1339.66  | -0.27 | 0    | 38    | 0.0038   | TFTIDSTNSNLK               |               |
|                |                                  |              |          |          | 671.24       | 1340.46  | 1340.65  | -0.20 | 0    | 53    | 0.00012  | GYQWQAYINAK                |               |
|                |                                  |              |          |          | 534.87       | 1601.57  | 1601.78  | -0.21 | 0    | 54    | 0.00019  | HTFDATGAQVPAPYK            |               |
|                |                                  |              |          |          | 802.70       | 1603.38  | 1603.82  | -0.44 | 0    | 95    | 1.2e-008 | NNALTFDQVQLDNK             |               |
|                |                                  |              |          |          | 942.03       | 1882.04  | 1882.84  | -0.79 | 0    | 37    | 0.0031   | GGYGVEDVVATPCSTDTR         |               |
|                |                                  |              |          |          | 696.21       | 2085.59  | 2086.05  | -0.46 | 0    | 60    | 1.4e-005 | DGEDGKPGVVGVININSTLTK      |               |
|                |                                  |              |          |          | 714.51       | 2140.50  | 2140.05  | 0.45  | 0    | 26    | 0.098    | SHIETNGGILNGTSAADVQTR      |               |
|                |                                  |              |          |          | 748.24       | 2241.69  | 2242.16  | -0.47 | 1    | 31    | 0.024    | NNALTFDQVQLDNKDPGIGK       |               |
|                |                                  |              |          |          | 891.43       | 2671.27  | 2670.27  | 1.00  | 0    | 48    | 0.00047  | ATMELELPQLAANAHFWDQVQSTGK  |               |
|                |                                  |              |          |          | 976.39       | 2926.14  | 2927.43  | -1.28 | 1    | 69    | 1.2e-006 | KEPGTVSPGVNLPSTQFQANVESANK |               |
| <b>SO1778</b>  | Decaheme cytochrome c, MtrC      | 343          | 72       | 7.0      | 538.76       | 1075.50  | 1075.58  | -0.08 | 0    | 74    | 1.1e-006 | VFNAQLTQR                  |               |
|                |                                  |              |          |          | 547.28       | 1092.55  | 1092.58  | -0.03 | 0    | 54    | 0.0001   | ADLAFATLSGK                |               |
|                |                                  |              |          |          | 726.71       | 1451.40  | 1451.71  | -0.31 | 0    | 85    | 7.5e-008 | ETLESFGAVVDGDK             |               |
|                |                                  |              |          |          | 878.08       | 1754.15  | 1754.78  | -0.63 | 0    | 87    | 3.5e-008 | FVDCADPAFDGVDVTK           |               |
| <b>SOa0110</b> | Lipoprotein, putative            | 322          | 145      | 8.0      | 675.17       | 1348.32  | 1348.70  | -0.38 | 0    | 48    | 0.00072  | VIDSTNNAFAAVK              |               |
|                |                                  |              |          |          | 678.73       | 1355.45  | 1355.71  | -0.26 | 0    | 46    | 0.00097  | VIYSNSSAFAAVK              |               |
|                |                                  |              |          |          | 699.23       | 1396.44  | 1396.74  | -0.30 | 0    | 74    | 7.9e-007 | VIYSTNNAFAAVK              |               |
|                |                                  |              |          |          | 720.20       | 1438.38  | 1438.72  | -0.34 | 0    | 59    | 3e-005   | QGATGITYTPGAFR             |               |
|                |                                  |              |          |          | 721.70       | 1441.39  | 1441.71  | -0.32 | 0    | 98    | 3.3e-009 | GVDQFTYVITDQK              |               |
|                |                                  |              |          |          | 735.10       | 1468.18  | 1468.66  | -0.48 | 0    | 30    | 0.023    | ENASVDYTPGNFR              |               |
|                |                                  |              |          |          | 964.51       | 1927.00  | 1926.90  | 0.11  | 0    | 27    | 0.032    | STGETYIPTAADDGFNIR         |               |
|                |                                  |              |          |          | 738.23       | 2211.68  | 2213.11  | -1.43 | 0    | 32    | 0.024    | LIADADGDALSIAHIYTANNR      |               |
| <b>SO3545</b>  | OmpA family protein              | 123          | 40       | 17       | 742.14       | 1482.27  | 1482.70  | -0.44 | 0    | 37    | 0.0037   | VDSVGCTLYENVK              |               |
|                |                                  |              |          |          | 755.28       | 1508.55  | 1508.85  | -0.30 | 0    | 48    | 0.00052  | GATLGLVGVWPLGNR            |               |
|                |                                  |              |          |          | 903.60       | 1805.19  | 1805.88  | -0.69 | 0    | 26    | 0.053    | QEDVGSIQFANDSAVVK          |               |
|                |                                  |              |          |          | 932.08       | 1862.15  | 1862.86  | -0.72 | 0    | 55    | 6.3e-005 | DLGSADWTTGGISNDAGVK        |               |
| <b>SO3896</b>  | Outer membrane porin, putative   | 90           | 39       | 11.0     | 636.69       | 1271.36  | 1271.58  | -0.22 | 0    | 62    | 2.5e-005 | SADGVWYYSK                 |               |
|                |                                  |              |          |          | 835.16       | 1668.31  | 1668.82  | -0.52 | 0    | 36    | 0.0043   | TNESLYALSATLGDQK           |               |
|                |                                  |              |          |          | 587.61       | 1759.81  | 1759.97  | -0.17 | 0    | 44    | 0.0019   | YTEVQIHDGKPTVVAK           |               |
| <b>SO1295</b>  | major outer membrane lipoprotein | 153          | 9        | 13.0     | 631.26       | 1260.51  | 1260.66  | -0.15 | 0    | 83    | 1.3e-007 | VDQLSADVSSLK               |               |
| <b>SO3286</b>  | cytochrome c ubiquinol oxidase   | 126          | 58       | 9.0      | 545.82       | 1089.62  | 1089.64  | -0.02 | 0    | 29    | 0.053    | VDLGYGLLLK                 |               |
|                |                                  |              |          |          | 604.27       | 1206.53  | 1206.64  | -0.11 | 0    | 49    | 0.00033  | IPYAMGIVATR                | Oxidation (M) |
|                |                                  |              |          |          | 660.22       | 1318.43  | 1318.68  | -0.25 | 0    | 50    | 0.00027  | MIVVEEVLSR                 | Oxidation (M) |
|                |                                  |              |          |          | 726.31       | 2175.90  | 2176.08  | -0.18 | 0    | 52    | 0.0001   | SLDEQVTGHDLISEHEVR         |               |
| <b>SO0217</b>  | Translation elongation factor Tu | 91           | 43       | 7.0      | 592.73       | 1183.45  | 1184.64  | -1.19 | 0    | 62    | 1.5e-005 | VGDEVEIVGIR                |               |
|                |                                  |              |          |          | 732.22       | 2193.63  | 2194.10  | -0.47 | 0    | 29    | 0.046    | DIDKPFLMPIEDVFSISGR        | Oxidation (M) |

#### Anti-OmcA IP / DSS

| Gene | Annotation | Mascot_Score | MW (kDa) | Coverage | Observed m/z | Mr(expt) | Mr(calc) | Delta | Miss | Score | Expect | Peptide | Var_Mod |
|------|------------|--------------|----------|----------|--------------|----------|----------|-------|------|-------|--------|---------|---------|
|------|------------|--------------|----------|----------|--------------|----------|----------|-------|------|-------|--------|---------|---------|

|               |                                       |     |    |      |        |         |         |       |   |    |          |                                  |               |
|---------------|---------------------------------------|-----|----|------|--------|---------|---------|-------|---|----|----------|----------------------------------|---------------|
| <b>SO1779</b> | Decaheme cytochrome c, OmcA           | 432 | 79 | 16.0 | 537.78 | 1073.54 | 1072.63 | 0.92  | 0 | 63 | 2.2e-005 | R.FGIAQLTPVK.E                   |               |
|               |                                       |     |    |      | 543.71 | 1085.40 | 1085.62 | -0.22 | 0 | 89 | 5.4e-008 | K.SNVVTGIALGR.S                  |               |
|               |                                       |     |    |      | 629.72 | 1257.43 | 1256.59 | 0.84  | 0 | 33 | 0.019    | K.EFISDPSAYTK.S                  |               |
|               |                                       |     |    |      | 650.71 | 1299.41 | 1299.62 | -0.22 | 0 | 60 | 4e-005   | R.YAYIQDQPFRR.F                  |               |
|               |                                       |     |    |      | 670.64 | 1339.27 | 1339.66 | -0.40 | 0 | 49 | 0.00047  | K.TFTIDSTNSNLK.L                 |               |
|               |                                       |     |    |      | 535.18 | 1602.52 | 1601.78 | 0.73  | 0 | 46 | 0.00099  | R.HTFDATGAQVPAPYK.I              |               |
|               |                                       |     |    |      | 696.18 | 2085.51 | 2086.05 | -0.55 | 0 | 40 | 0.0029   | K.DGEDGKPGVGVGNINSTLKA           |               |
|               |                                       |     |    |      | 977.02 | 2928.05 | 2927.43 | 0.63  | 1 | 51 | 0.00028  | K.KEPGTVPSGVDNLNPSTQFQANVESANK.C |               |
| <b>SO1778</b> | Decaheme cytochrome c, MtrC           | 49  | 72 | 3.0  | 547.27 | 1092.53 | 1092.58 | -0.05 | 0 | 33 | 0.023    | K.ADLAFATLSGKA                   |               |
|               |                                       |     |    |      | 726.64 | 1451.27 | 1451.71 | -0.44 | 0 | 36 | 0.0099   | K.ETLESFGAVVDGTK.D               |               |
| <b>SO3545</b> | OmpA family protein                   | 45  | 40 | 8.0  | 742.66 | 1483.31 | 1482.70 | 0.61  | 0 | 32 | 0.024    | K.VDSVCGTLYENVK.K                |               |
|               |                                       |     |    |      | 602.91 | 1805.72 | 1804.97 | 0.75  | 0 | 34 | 0.016    | R.VTSNGYGITKPLVAGNSK.E           |               |
| <b>SO3896</b> | Outer membrane porin, putative        | 67  | 39 | 7.0  | 636.69 | 1271.36 | 1271.58 | -0.22 | 0 | 49 | 0.00047  | R.SADGVWYYSK.P                   |               |
|               |                                       |     |    |      | 587.60 | 1759.77 | 1759.97 | -0.21 | 0 | 37 | 0.0077   | K.YTEVQHDGKPTVVAKS               |               |
| <b>SO1295</b> | major outer membrane lipoprotein      | 78  | 9  | 13.0 | 631.26 | 1260.50 | 1260.66 | -0.16 | 0 | 61 | 3e-005   | K.VDQLSADVSSLK.S                 |               |
| <b>SO1824</b> | conserved hypothetical                | 51  | 25 | 9.0  | 596.76 | 1191.50 | 1191.65 | -0.15 | 0 | 30 | 0.043    | R.LILDAYSIER.D                   |               |
|               |                                       |     |    |      | 618.16 | 1234.31 | 1234.66 | -0.34 | 0 | 39 | 0.0042   | R.VALYAQSLDQK.T                  |               |
| <b>SO1825</b> | MotA/TolQ/ExbB proton channel protein | 103 | 48 | 7.0  | 655.22 | 1308.43 | 1307.67 | 0.76  | 0 | 67 | 6e-006   | K.FQGSVTAIDGSVK.T                |               |
|               |                                       |     |    |      | 726.22 | 1450.42 | 1450.71 | -0.29 | 0 | 29 | 0.019    | K.TAQDGLGEMFGVVK.S               |               |
| <b>SO0217</b> | Translation elongation factor Tu      | 94  | 43 | 6.0  | 592.91 | 1183.82 | 1184.64 | -0.82 | 0 | 62 | 2.6e-005 | R.VGDEVEIVGIR.T                  |               |
|               |                                       |     |    |      | 732.22 | 2193.63 | 2194.10 | -0.47 | 0 | 29 | 0.046    | K.DIDKPFMLPIEDVFSISGR.E          | Oxidation (M) |
| <b>SO0237</b> | ribosomal protein S3                  | 141 | 25 | 11.0 | 672.21 | 1342.40 | 1341.73 | 0.67  | 0 | 77 | 5.8e-007 | K.LVADSIAQQLER.R                 |               |
|               |                                       |     |    |      | 734.16 | 1466.32 | 1465.83 | 0.49  | 0 | 46 | 0.00087  | K.LAGTPAQINIAEIR.K               |               |

#### Anti-MtrC IP / DSS

| Gene          | Annotation                            | Mascot_Score | MW (kDa) | Coverage | Observed m/z | Mr(expt) | Mr(calc) | Delta | Miss | Score | Expect   | Peptide                 | Var_Mod       |
|---------------|---------------------------------------|--------------|----------|----------|--------------|----------|----------|-------|------|-------|----------|-------------------------|---------------|
| <b>SO1779</b> | Decaheme cytochrome c, OmcA           | 132          | 79       | 4.0      | 537.29       | 1072.56  | 1072.63  | -0.07 | 0    | 67    | 8.6e-006 | R.FGIAQLTPVK.E          |               |
|               |                                       |              |          |          | 651.24       | 1300.47  | 1299.62  | 0.85  | 0    | 46    | 0.0013   | R.YAYIQDQPFRR.F         |               |
|               |                                       |              |          |          | 670.77       | 1339.52  | 1339.66  | -0.14 | 0    | 34    | 0.009    | K.TFTIDSTNSNLK.L        |               |
| <b>SO1778</b> | Decaheme cytochrome c, MtrC           | 307          | 72       | 6.0      | 547.31       | 1092.60  | 1092.58  | 0.02  | 0    | 74    | 7.5e-007 | K.ADLAFATLSGKA          |               |
|               |                                       |              |          |          | 726.74       | 1451.46  | 1451.71  | -0.25 | 0    | 82    | 1.5e-007 | K.ETLESFGAVVDGTK.D      |               |
|               |                                       |              |          |          | 878.11       | 1754.20  | 1754.78  | -0.58 | 0    | 84    | 1.5e-007 | K.FVDCADPAFDGVDVTK.Y    |               |
| <b>SO1295</b> | major outer membrane lipoprotein      | 96           | 9        | 13.0     | 631.33       | 1260.64  | 1260.66  | -0.02 | 0    | 64    | 9.2e-006 | K.VDQLSADVSSLK.S        |               |
| <b>SO1825</b> | MotA/TolQ/ExbB proton channel protein | 87           | 48       | 5.0      | 654.79       | 1307.57  | 1307.67  | -0.10 | 0    | 55    | 6.2e-005 | K.FQGSVTAIDGSVK.T       |               |
|               |                                       |              |          |          | 733.76       | 1465.51  | 1466.71  | -1.19 | 0    | 32    | 0.03     | K.TAQDGLGEMFGVVK.G      | Oxidation (M) |
| <b>SO0217</b> | Translation elongation factor Tu      | 146          | 43       | 11.0     | 593.34       | 1184.66  | 1184.64  | 0.02  | 0    | 90    | 4.3e-008 | R.VGDEVEIVGIR.T         |               |
|               |                                       |              |          |          | 601.97       | 1802.88  | 1802.88  | -0.00 | 0    | 31    | 0.02     | R.GITINTSHIEYDTPSR.H    |               |
|               |                                       |              |          |          | 732.53       | 2194.57  | 2194.10  | 0.47  | 0    | 39    | 0.0025   | R.DIDKPFMLPIEDVFSISGR.G | Oxidation (M) |
| <b>SO0237</b> | ribosomal protein S3                  | 125          | 25       | 11.0     | 671.27       | 1340.53  | 1341.73  | -1.20 | 0    | 71    | 2.8e-006 | K.LVADSIAQQLER.R        |               |
|               |                                       |              |          |          | 733.78       | 1465.55  | 1465.83  | -0.28 | 0    | 78    | 4e-007   | K.LAGTPAQINIAEIR.K      |               |

#### Anti-OmcA IP / DST

| Gene          | Annotation                       | Mascot_Score | MW (kDa) | Coverage | Observed m/z | Mr(expt) | Mr(calc) | Delta | Miss | Score | Expect   | Peptide                  | Var_Mod |
|---------------|----------------------------------|--------------|----------|----------|--------------|----------|----------|-------|------|-------|----------|--------------------------|---------|
| <b>SO1779</b> | Decaheme cytochrome c, OmcA      | 523          | 79       | 12.0     | 537.29       | 1072.57  | 1072.63  | -0.05 | 0    | 68    | 3.7e-006 | R.FGIAQLTPVK.E           |         |
|               |                                  |              |          |          | 543.78       | 1085.55  | 1085.62  | -0.07 | 0    | 90    | 5.3e-008 | K.SNVVTGIALGR.S          |         |
|               |                                  |              |          |          | 650.22       | 1298.43  | 1299.62  | -1.20 | 0    | 54    | 8.7e-005 | R.YAYIQDQPFRR.F          |         |
|               |                                  |              |          |          | 670.69       | 1339.37  | 1339.66  | -0.29 | 0    | 48    | 0.00044  | K.TFTIDSTNSNLK.L         |         |
|               |                                  |              |          |          | 801.64       | 1601.27  | 1601.78  | -0.52 | 0    | 36    | 0.0075   | R.HTFDATGAQVPAPYK.I      |         |
|               |                                  |              |          |          | 802.69       | 1603.36  | 1603.82  | -0.46 | 0    | 94    | 1.3e-008 | K.NNALTFDVQILDNK.D       |         |
|               |                                  |              |          |          | 714.87       | 2141.59  | 2140.05  | 1.53  | 0    | 56    | 0.00012  | K.SHIETNGGILNGTSAADVQTRA |         |
| <b>SO1778</b> | Decaheme cytochrome c, MtrC      | 118          | 72       | 3.0      | 547.29       | 1092.56  | 1092.58  | -0.02 | 0    | 60    | 4.5e-005 | K.ADLAFATLSGKA           |         |
|               |                                  |              |          |          | 726.72       | 1451.43  | 1451.71  | -0.29 | 0    | 61    | 2e-005   | K.ETLESFGAVVDGTK.D       |         |
| <b>SO3545</b> | OmpA family protein              | 376          | 40       | 22.0     | 742.15       | 1482.29  | 1482.70  | -0.41 | 0    | 72    | 1.7e-006 | K.VDSVCGTLYENVK.K        |         |
|               |                                  |              |          |          | 754.98       | 1507.95  | 1508.85  | -0.89 | 0    | 58    | 7.6e-005 | K.GATLGLVGVWPLGNR.W      |         |
|               |                                  |              |          |          | 903.58       | 1805.14  | 1805.88  | -0.74 | 0    | 75    | 1.5e-006 | K.QEDVGSIQFANDSAVVK.K    |         |
|               |                                  |              |          |          | 602.93       | 1805.77  | 1804.97  | 0.80  | 0    | 68    | 3.5e-006 | R.VTSNGYGITKPLVAGNSK.E   |         |
|               |                                  |              |          |          | 932.09       | 1862.17  | 1862.86  | -0.70 | 0    | 105   | 8.2e-010 | R.DLGSADWTTGGISNDAGVK.G  |         |
|               |                                  |              |          |          | 645.59       | 1933.74  | 1933.97  | -0.23 | 1    | 98    | 9e-009   | K.KQEDVGSIQFANDSAVVK.K   |         |
| <b>SO1295</b> | major outer membrane lipoprotein | 202          | 9        | 13.0     | 631.27       | 1260.53  | 1260.66  | -0.12 | 0    | 83    | 1.3e-007 | K.VDQLSADVSSLK.S         |         |
| <b>SO3286</b> | cytochrome c ubiquinol oxidase   | 76           | 58       | 5.0      | 596.18       | 1190.34  | 1190.65  | -0.31 | 0    | 52    | 0.00035  | K.IPYAMGIVATRS           |         |

|        |                                    |     |     |      |        |         |         |       |   |     |          |                            |
|--------|------------------------------------|-----|-----|------|--------|---------|---------|-------|---|-----|----------|----------------------------|
| S00217 | Translation elongation factor Tu   | 231 | 43  | 21.0 | 726.28 | 2175.83 | 2176.08 | -0.25 | 0 | 52  | 0.00017  | R.SLDEQVTTGIHDLISEHEVR.I   |
|        |                                    |     |     |      | 593.28 | 1184.54 | 1184.64 | -0.10 | 0 | 100 | 4.9e-009 | R.VGDEVEIVGIRT             |
|        |                                    |     |     |      | 794.20 | 1586.39 | 1586.82 | -0.42 | 0 | 31  | 0.042    | K.VTLICPIAMDEGLR.F         |
|        |                                    |     |     |      | 950.15 | 1898.28 | 1899.00 | -0.72 | 0 | 38  | 0.0071   | K.ILELAAALDSYIPEPER.D      |
| S01930 | 2-oxoglutarate dehydrogenase, sucA | 72  | 105 | 2.0  | 732.53 | 2194.58 | 2194.10 | 0.48  | 0 | 72  | 3.2e-006 | R.DIDKPFLLMPIDVFSISGR.G    |
|        |                                    |     |     |      | 802.58 | 2404.72 | 2405.20 | -0.48 | 0 | 54  | 0.00022  | R.ELLSEYDFPGDDLPIVIGSALK.A |
|        |                                    |     |     |      | 678.72 | 1355.43 | 1355.73 | -0.30 | 0 | 50  | 0.00051  | R.ILEGLNAAEGIEKY           |
|        |                                    |     |     |      | 846.99 | 1691.96 | 1692.76 | -0.81 | 0 | 45  | 0.0015   | R.EWDEAYDASLPIERL          |

#### Anti-MtrC IP / DST

| Gene   | Annotation                       | Mascot_Score | MW (kDa) | Coverage | Observed m/z | Mr(expt) | Mr(calc) | Delta | Miss | Score | Expect   | Peptide                    | Var_Mod |
|--------|----------------------------------|--------------|----------|----------|--------------|----------|----------|-------|------|-------|----------|----------------------------|---------|
| S01778 | Decaheme cytochrome c, MtrC      | 136          | 72       | 4.0      | 726.78       | 1451.54  | 1451.71  | -0.18 | 0    | 75    | 1.4e-006 | K.ETLESFGAVVDGTDK.D        |         |
|        |                                  |              |          |          | 878.12       | 1754.23  | 1754.78  | -0.56 | 0    | 54    | 9e-005   | K.FVDCADPAFDGVDVTK.Y       |         |
| S03545 | OmpA family protein              | 189          | 40       | 18.0     | 742.15       | 1482.30  | 1482.70  | -0.41 | 0    | 51    | 0.00044  | K.VDSVCGTLYENVK.K          |         |
|        |                                  |              |          |          | 602.99       | 1805.96  | 1804.97  | 0.99  | 0    | 53    | 0.00028  | R.VTNGYGTIKPLVAGNSK.E      |         |
|        |                                  |              |          |          | 932.05       | 1862.08  | 1862.86  | -0.78 | 0    | 77    | 8.9e-007 | R.DLGSADWTTGGISNDAGVK.G    |         |
|        |                                  |              |          |          | 645.36       | 1933.05  | 1933.97  | -0.93 | 1    | 66    | 5.8e-006 | K.KQEDVGSIQFANDSAVVK.K     |         |
| S03896 | Outer membrane porin, putative   | 97           | 39       | 4.0      | 636.15       | 1270.28  | 1271.58  | -1.30 | 0    | 70    | 5.8e-006 | R.SADGVVWYSPK.I            |         |
|        |                                  |              |          |          | 587.60       | 1759.77  | 1759.97  | -0.21 | 0    | 37    | 0.0077   | K.YTEVQIHDGKPTVVAKS        |         |
| S01295 | major outer membrane lipoprotein | 153          | 9        | 13.0     | 631.27       | 1260.54  | 1260.66  | -0.12 | 0    | 82    | 1.4e-007 | K.VDQLSADVSSLK.S           |         |
| S00217 | Translation elongation factor Tu | 120          | 43       | 8.0      | 593.83       | 1185.65  | 1184.64  | 1.01  | 0    | 88    | 3.3e-008 | R.VGDEVEIVGIRT             |         |
|        |                                  |              |          |          | 802.57       | 2404.69  | 2405.20  | -0.51 | 0    | 31    | 0.041    | R.ELLSEYDFPGDDLPIVIGSALK.A |         |

#### ΔMtrC / Anti-OmcA IP / MRN

| Gene   | Annotation                       | Mascot_Score | MW (kDa) | Coverage | Observed m/z | Mr(expt)              | Mr(calc) | Delta | Miss | Score  | Expect   | Peptide                         | Var_Mod |   |    |         |                    |  |
|--------|----------------------------------|--------------|----------|----------|--------------|-----------------------|----------|-------|------|--------|----------|---------------------------------|---------|---|----|---------|--------------------|--|
| S01779 | Decaheme cytochrome c, OmcA      | 971          | 79       | 24.0     | 537.32       | 1072.62               | 1072.63  | -0.01 | 0    | 63     | 1.2e-005 | R.FGIAQLTPVK.E                  |         |   |    |         |                    |  |
|        |                                  |              |          |          | 543.81       | 1085.60               | 1085.62  | -0.02 | 0    | 96     | 5.7e-009 | K.SNVVTGIALGR.S                 |         |   |    |         |                    |  |
|        |                                  |              |          |          | 650.76       | 1299.50               | 1299.62  | -0.12 | 0    | 55     | 8.6e-005 | R.YAYIQDQPFRR.F                 |         |   |    |         |                    |  |
|        |                                  |              |          |          | 670.74       | 1339.46               | 1339.66  | -0.20 | 0    | 45     | 0.00072  | K.TFTIDSTNSNLK.L                |         |   |    |         |                    |  |
|        |                                  |              |          |          | 671.27       | 1340.52               | 1340.65  | -0.13 | 0    | 62     | 1.2e-005 | R.GYQWQAYINAK.K                 |         |   |    |         |                    |  |
|        |                                  |              |          |          | 534.93       | 1601.78               | 1601.78  | -0.00 | 0    | 69     | 5.3e-006 | R.HTFDATGAQVPAPYK.I             |         |   |    |         |                    |  |
|        |                                  |              |          |          | 802.71       | 1603.41               | 1603.82  | -0.41 | 0    | 125    | 1e-011   | K.NNALTFDVLQDNDK.D              |         |   |    |         |                    |  |
|        |                                  |              |          |          | 942.09       | 1882.16               | 1882.84  | -0.68 | 0    | 59     | 2.5e-005 | K.GYGVEDVAVTAPCSTDTR.Y          |         |   |    |         |                    |  |
|        |                                  |              |          |          | 696.26       | 2085.74               | 2086.05  | -0.31 | 0    | 57     | 3.6e-005 | K.DGEDGKPGVGVNINSTLKA           |         |   |    |         |                    |  |
|        |                                  |              |          |          | 714.18       | 2139.52               | 2140.05  | -0.53 | 0    | 44     | 0.0021   | K.SHIETNGGILNGTSAADVQTRA        |         |   |    |         |                    |  |
|        |                                  |              |          |          | 748.24       | 2241.69               | 2242.16  | -0.47 | 1    | 31     | 0.038    | K.NNALTFDVLQDNDKQPIGK.E         |         |   |    |         |                    |  |
|        |                                  |              |          |          | 976.49       | 2926.44               | 2927.43  | -0.98 | 1    | 70     | 3.7e-006 | K.KEPGTVPSPGVNLPSTQFQANVESANK.C |         |   |    |         |                    |  |
|        |                                  |              |          |          | S0a0110      | Lipoprotein, putative | 308      | 145   | 7.0  | 669.29 | 1336.57  | 1336.72                         | -0.15   | 0 | 47 | 0.00085 | K.VIDSTTSFAFAVVK.E |  |
|        |                                  |              |          |          |              |                       |          |       |      | 678.79 | 1355.57  | 1355.71                         | -0.14   | 0 | 34 | 0.015   | K.VIYSNSSAFAAVK.Q  |  |
| 699.28 | 1396.55                          | 1396.74      | -0.19    | 0        |              |                       |          |       |      | 73     | 1.1e-006 | K.VIYSTNNAFAAVK.E               |         |   |    |         |                    |  |
| 714.76 | 1427.51                          | 1427.69      | -0.18    | 0        |              |                       |          |       |      | 68     | 3.1e-006 | R.GVDQFTYLVSDGK.G               |         |   |    |         |                    |  |
| 720.22 | 1438.43                          | 1438.72      | -0.29    | 0        |              |                       |          |       |      | 56     | 5.5e-005 | K.QGATGITYTPGAFR.G              |         |   |    |         |                    |  |
| 721.74 | 1441.47                          | 1441.71      | -0.24    | 0        |              |                       |          |       |      | 94     | 9.5e-009 | R.GVDQFTYVITDVGK.D              |         |   |    |         |                    |  |
| 722.49 | 1442.96                          | 1443.80      | -0.84    | 0        |              |                       |          |       |      | 40     | 0.0045   | K.LAPNLFLETSIN.-                |         |   |    |         |                    |  |
| S03545 | OmpA family protein              | 472          | 40       | 17.0     | 735.18       | 1468.35               | 1468.66  | -0.30 | 0    | 54     | 0.00012  | K.ENASVDYTPGNFR.G               |         |   |    |         |                    |  |
|        |                                  |              |          |          | 742.22       | 1482.42               | 1482.70  | -0.28 | 0    | 77     | 4.2e-007 | K.VDSVCGTLYENVK.K               |         |   |    |         |                    |  |
|        |                                  |              |          |          | 755.28       | 1508.54               | 1508.85  | -0.30 | 0    | 90     | 1.9e-008 | K.GATLGLGVWVPLGNR.W             |         |   |    |         |                    |  |
|        |                                  |              |          |          | 903.65       | 1805.28               | 1805.88  | -0.60 | 0    | 87     | 4.8e-008 | K.QEDVGSIQFANDSAVVK.K           |         |   |    |         |                    |  |
|        |                                  |              |          |          | 932.12       | 1862.23               | 1862.86  | -0.63 | 0    | 133    | 9e-013   | R.DLGSADWTTGGISNDAGVK.G         |         |   |    |         |                    |  |
| S03896 | Outer membrane porin, putative   | 100          | 39       | 11.0     | 645.62       | 1933.82               | 1933.97  | -0.15 | 1    | 90     | 1.8e-008 | K.KQEDVGSIQFANDSAVVK.K          |         |   |    |         |                    |  |
|        |                                  |              |          |          | 636.76       | 1271.50               | 1271.58  | -0.08 | 0    | 47     | 0.00081  | R.SADGVVWYSPK.I                 |         |   |    |         |                    |  |
| S01295 | major outer membrane lipoprotein | 183          | 9        | 13.0     | 835.17       | 1668.34               | 1668.82  | -0.49 | 0    | 45     | 0.00077  | K.TNESLYALSATLGDGSK.F           |         |   |    |         |                    |  |
|        |                                  |              |          |          | 587.59       | 1759.76               | 1759.97  | -0.21 | 0    | 47     | 0.00044  | K.YTEVQIHDGKPTVVAKS             |         |   |    |         |                    |  |
| S01824 | conserved hypothetical           | 69           | 25       | 10.0     | 631.28       | 1260.56               | 1260.66  | -0.10 | 0    | 82     | 1.3e-007 | K.VDQLSADVSSLK.S                |         |   |    |         |                    |  |
|        |                                  |              |          |          | 651.24       | 1300.47               | 1300.72  | -0.25 | 0    | 28     | 0.079    | R.LLNTAEVTLAEKY                 |         |   |    |         |                    |  |
| S03286 | cytochrome c ubiquinol oxidase   | 68           | 58       | 5.0      | 654.30       | 1306.59               | 1307.69  | -1.09 | 0    | 69     | 2.4e-006 | K.EVLVDFNLR.V                   |         |   |    |         |                    |  |
|        |                                  |              |          |          | 596.37       | 1190.73               | 1190.65  | 0.08  | 0    | 32     | 0.03     | K.IPYAMGIVATRS                  |         |   |    |         |                    |  |
| S04747 | ATP synthase F1, beta subunit    | 108          | 49       | 5.0      | 726.63       | 2176.86               | 2176.08  | 0.78  | 0    | 57     | 3.9e-005 | R.SLDEQVTTGIHDLISEHEVR.I        |         |   |    |         |                    |  |
|        |                                  |              |          |          | 683.76       | 1365.51               | 1365.73  | -0.22 | 0    | 37     | 0.0031   | R.DVLLFVDNRY.R                  |         |   |    |         |                    |  |
|        |                                  |              |          |          | 725.78       | 1449.56               | 1449.78  | -0.23 | 0    | 93     | 2.2e-008 | R.YTLAGTEVSALLGR.M              |         |   |    |         |                    |  |

|                                         |                                   |                     |                 |                 |                     |                 |                 |              |             |              |               |                                 |                |
|-----------------------------------------|-----------------------------------|---------------------|-----------------|-----------------|---------------------|-----------------|-----------------|--------------|-------------|--------------|---------------|---------------------------------|----------------|
| SO0217                                  | Translation elongation factor Tu  | 82                  | 43              | 4.0             | 593.34              | 1184.66         | 1184.64         | 0.02         | 0           | 82           | 1.1e-007      | R.VGDEVEIVGIRT                  |                |
|                                         |                                   |                     |                 |                 | 601.97              | 1802.88         | 1802.88         | -0.00        | 0           | 31           | 0.02          | R.GITINTSHIEYDTPSR.H            |                |
| <b>ΔOmcA / Anti-MtrC IP / MRN</b>       |                                   |                     |                 |                 |                     |                 |                 |              |             |              |               |                                 |                |
| <b>Gene</b>                             | <b>Annotation</b>                 | <b>Mascot_Score</b> | <b>MW (kDa)</b> | <b>Coverage</b> | <b>Observed m/z</b> | <b>Mr(expt)</b> | <b>Mr(calc)</b> | <b>Delta</b> | <b>Miss</b> | <b>Score</b> | <b>Expect</b> | <b>Peptide</b>                  | <b>Var_Mod</b> |
| SO1778                                  | Decaheme cytochrome c, MtrC       | 333                 | 72              | 6.0             | 547.28              | 1092.55         | 1092.58         | -0.03        | 0           | 81           | 1.6e-007      | K.ADLAFATLSGKA                  |                |
|                                         |                                   |                     |                 |                 | 726.69              | 1451.36         | 1451.71         | -0.35        | 0           | 97           | 5.8e-009      | K.ETLESFGAVVDGKTD               |                |
|                                         |                                   |                     |                 |                 | 878.08              | 1754.15         | 1754.78         | -0.63        | 0           | 76           | 5.4e-007      | K.FVDCADPAFDGVDVTK.Y            |                |
| SO1295                                  | major outer membrane lipoprotein  | 179                 | 9               | 13.0            | 631.25              | 1260.48         | 1260.66         | -0.17        | 0           | 82           | 1.6e-007      | K.VDQLSADVSSLK.S                |                |
| <b>ΔMtrC / Anti-OmcA IP / DSS</b>       |                                   |                     |                 |                 |                     |                 |                 |              |             |              |               |                                 |                |
| <b>Gene</b>                             | <b>Annotation</b>                 | <b>Mascot_Score</b> | <b>MW (kDa)</b> | <b>Coverage</b> | <b>Observed m/z</b> | <b>Mr(expt)</b> | <b>Mr(calc)</b> | <b>Delta</b> | <b>Miss</b> | <b>Score</b> | <b>Expect</b> | <b>Peptide</b>                  | <b>Var_Mod</b> |
| SO1779                                  | Decaheme cytochrome c, OmcA       | 476                 | 79              | 17.0            | 537.33              | 1072.64         | 1072.63         | 0.01         | 0           | 80           | 2.4e-007      | R.FGIAQLTPVK.E                  |                |
|                                         |                                   |                     |                 |                 | 543.84              | 1085.67         | 1085.62         | 0.05         | 0           | 96           | 6.4e-009      | K.SNVVTGIALGR.S                 |                |
|                                         |                                   |                     |                 |                 | 629.29              | 1256.57         | 1256.59         | -0.03        | 0           | 32           | 0.014         | K.EFISDPSAYTK.S                 |                |
|                                         |                                   |                     |                 |                 | 650.74              | 1299.47         | 1299.62         | -0.16        | 0           | 61           | 3.9e-005      | R.YAYIQDQPR.F                   |                |
|                                         |                                   |                     |                 |                 | 670.78              | 1339.54         | 1339.66         | -0.12        | 0           | 43           | 0.0013        | K.TFTIDSTNSNLK.L                |                |
|                                         |                                   |                     |                 |                 | 671.25              | 1340.49         | 1340.65         | -0.16        | 0           | 34           | 0.007         | R.GYQWQAYINAK.K                 |                |
|                                         |                                   |                     |                 |                 | 802.69              | 1603.37         | 1603.82         | -0.45        | 0           | 71           | 2.2e-006      | K.NNALTFDQVQLDNK.D              |                |
|                                         |                                   |                     |                 |                 | 714.54              | 2140.60         | 2140.05         | 0.55         | 0           | 42           | 0.0027        | K.SHIETNGGILNGTSAADVQTRA        |                |
|                                         |                                   |                     |                 |                 | 934.08              | 2799.22         | 2799.33         | -0.11        | 0           | 26           | 0.085         | K.EPGTVPSPGVDNLPSTQFQANVESANK.C |                |
| SO3545                                  | OmpA family protein               | 149                 | 40              | 22.0            | 742.22              | 1482.42         | 1482.70         | -0.28        | 0           | 33           | 0.012         | K.VDSVCGTLYENVK.K               |                |
|                                         |                                   |                     |                 |                 | 755.26              | 1508.51         | 1508.85         | -0.34        | 0           | 73           | 1.1e-006      | K.GATLGLGVWPLGNR.W              |                |
|                                         |                                   |                     |                 |                 | 602.52              | 1804.55         | 1804.97         | -0.42        | 0           | 32           | 0.032         | R.VTNSNGYGITKPLVAGNSK.E         |                |
|                                         |                                   |                     |                 |                 | 932.13              | 1862.24         | 1862.86         | -0.63        | 0           | 58           | 2.9e-005      | R.DLGSADWTTGGISNDAGVK.G         |                |
|                                         |                                   |                     |                 |                 | 645.63              | 1933.88         | 1933.97         | -0.09        | 1           | 52           | 0.00012       | K.KQEDVGSIQFANDSAVVK.K          |                |
| SO3896                                  | Outer membrane porin, putative    | 125                 | 39              | 11.0            | 636.30              | 1270.59         | 1271.58         | -0.99        | 0           | 54           | 0.00016       | R.SADGVWYSPK.I                  |                |
|                                         |                                   |                     |                 |                 | 835.19              | 1668.36         | 1668.82         | -0.46        | 0           | 62           | 1.5e-005      | K.TNESLYALSATLGDGSKF            |                |
|                                         |                                   |                     |                 |                 | 587.73              | 1760.18         | 1759.97         | 0.21         | 0           | 31           | 0.018         | K.YTEVQIHGDKPTVVAK.S            |                |
| SO1295                                  | major outer membrane lipoprotein  | 153                 | 9               | 13.0            | 631.32              | 1260.62         | 1260.66         | -0.04        | 0           | 88           | 3.4e-008      | K.VDQLSADVSSLK.S                |                |
| SO0237                                  | ribosomal protein S3              | 105                 | 25              | 11.0            | 671.80              | 1341.58         | 1341.73         | -0.14        | 0           | 64           | 8.5e-006      | K.LVADSLAQQLER.R                |                |
|                                         |                                   |                     |                 |                 | 733.18              | 1464.35         | 1465.83         | -1.48        | 0           | 46           | 0.00098       | K.LAGTPAQINIAEIR.K              |                |
| <b>ΔOmcA / Anti-MtrC IP / DSS</b>       |                                   |                     |                 |                 |                     |                 |                 |              |             |              |               |                                 |                |
| <b>Gene</b>                             | <b>Annotation</b>                 | <b>Mascot_Score</b> | <b>MW (kDa)</b> | <b>Coverage</b> | <b>Observed m/z</b> | <b>Mr(expt)</b> | <b>Mr(calc)</b> | <b>Delta</b> | <b>Miss</b> | <b>Score</b> | <b>Expect</b> | <b>Peptide</b>                  | <b>Var_Mod</b> |
| SO1778                                  | Decaheme cytochrome c, MtrC       | 312                 | 72              | 6.0             | 547.29              | 1092.57         | 1092.58         | -0.01        | 0           | 72           | 1.2e-006      | K.ADLAFATLSGKA                  |                |
|                                         |                                   |                     |                 |                 | 726.75              | 1451.48         | 1451.71         | -0.23        | 0           | 92           | 1.5e-008      | K.ETLESFGAVVDGKTD               |                |
|                                         |                                   |                     |                 |                 | 878.13              | 1754.24         | 1754.78         | -0.55        | 0           | 71           | 1.6e-006      | K.FVDCADPAFDGVDVTK.Y            |                |
| SO1295                                  | major outer membrane lipoprotein  | 106                 | 9               | 13.0            | 631.35              | 1260.68         | 1260.66         | 0.02         | 0           | 68           | 3.4e-006      | K.VDQLSADVSSLK.S                |                |
| SO1490                                  | alcohol dehydrogenase II, AdhB    | 306                 | 40              | 29.0            | 537.30              | 1072.58         | 1072.54         | 0.04         | 0           | 66           | 1.2e-005      | K.GAVDDAIGDIK.T                 |                |
|                                         |                                   |                     |                 |                 | 562.76              | 1123.51         | 1123.53         | -0.02        | 0           | 24           | 0.071         | R.FCIITDEAR.H                   |                |
|                                         |                                   |                     |                 |                 | 600.88              | 1199.74         | 1199.69         | 0.06         | 0           | 35           | 0.014         | K.GIALVATNGGSIK.D               |                |
|                                         |                                   |                     |                 |                 | 685.78              | 1369.54         | 1369.71         | -0.17        | 0           | 73           | 1e-006        | K.AEDIPTLADNALK.D               |                |
|                                         |                                   |                     |                 |                 | 741.32              | 1480.62         | 1480.86         | -0.24        | 0           | 55           | 6e-005        | K.AIELIQGNLVNAVK.Q              |                |
|                                         |                                   |                     |                 |                 | 753.72              | 1505.43         | 1505.74         | -0.31        | 0           | 95           | 5.9e-009      | K.MTDEQGAATAITAIK.T             | Oxidation (M)  |
|                                         |                                   |                     |                 |                 | 608.62              | 1822.82         | 1822.95         | -0.13        | 0           | 36           | 0.011         | K.HHTPILSVNDPELMLK.K            | Oxidation (M)  |
|                                         |                                   |                     |                 |                 | 801.51              | 2401.51         | 2402.25         | -0.74        | 0           | 32           | 0.012         | K.STKPQLPLVAINTTAGTASEMTR.F     | Oxidation (M)  |
| SO0217                                  | Translation elongation factor Tu  | 179                 | 43              | 20.0            | 593.29              | 1184.58         | 1184.64         | -0.06        | 0           | 69           | 2.5e-006      | R.VGDEVEIVGIRT                  |                |
|                                         |                                   |                     |                 |                 | 710.73              | 1419.44         | 1419.63         | -0.19        | 0           | 29           | 0.034         | K.DFSQIDNAPEER.E                |                |
|                                         |                                   |                     |                 |                 | 633.99              | 1898.94         | 1899.00         | -0.06        | 0           | 32           | 0.023         | K.ILELAAALDSYIPEPER.D           |                |
|                                         |                                   |                     |                 |                 | 732.23              | 2193.65         | 2194.10         | -0.44        | 0           | 67           | 8.7e-006      | R.DIDKPFLLMPIEDVFSISGR.G        | Oxidation (M)  |
|                                         |                                   |                     |                 |                 | 802.53              | 2404.56         | 2405.20         | -0.64        | 0           | 52           | 0.00012       | R.ELLSEYDFPGDDLPVIQGSALK.A      |                |
| SO0314                                  | Ornithine Decarboxylase           | 57                  | 82              | 3.0             | 731.75              | 1461.49         | 1461.77         | -0.28        | 0           | 38           | 0.0039        | K.FLLTTPGIDAETGK.Y              |                |
|                                         |                                   |                     |                 |                 | 781.17              | 1560.32         | 1560.76         | -0.44        | 0           | 35           | 0.013         | K.VMDPQEANLEFIR.G               |                |
| <b>Cell lysate / Anti-OmcA IP / DSS</b> |                                   |                     |                 |                 |                     |                 |                 |              |             |              |               |                                 |                |
| <b>Gene</b>                             | <b>Annotation</b>                 | <b>Mascot_Score</b> | <b>MW (kDa)</b> | <b>Coverage</b> | <b>Observed m/z</b> | <b>Mr(expt)</b> | <b>Mr(calc)</b> | <b>Delta</b> | <b>Miss</b> | <b>Score</b> | <b>Expect</b> | <b>Peptide</b>                  | <b>Var_Mod</b> |
| SO0225                                  | DNA-directed RNA polymerase, rpoC | 1928                | 156             | 33.0            | 521.78              | 1041.55         | 1041.62         | -0.07        | 0           | 37           | 0.0056        | R.SVITVGPTRLR.L                 |                |
|                                         |                                   |                     |                 |                 | 527.78              | 1053.55         | 1053.62         | -0.07        | 0           | 74           | 8.6e-007      | K.IGLASPDLIRS                   |                |
|                                         |                                   |                     |                 |                 | 601.29              | 1200.56         | 1200.65         | -0.09        | 0           | 105          | 7.4e-010      | K.MGAEAVLELLR.A                 |                |

|               |                                   |      |     |      |  |         |         |         |       |   |     |          |                                    |               |
|---------------|-----------------------------------|------|-----|------|--|---------|---------|---------|-------|---|-----|----------|------------------------------------|---------------|
|               |                                   |      |     |      |  | 615.75  | 1229.49 | 1229.62 | -0.13 | 0 | 74  | 1.1e-006 | K.AYATGAAELHAR.V                   |               |
|               |                                   |      |     |      |  | 623.25  | 1244.49 | 1244.64 | -0.15 | 0 | 46  | 0.0013   | K.VIDIWASANEK.V                    |               |
|               |                                   |      |     |      |  | 637.22  | 1272.42 | 1273.61 | -1.19 | 0 | 33  | 0.013    | R.EELPSINSETR.R                    |               |
|               |                                   |      |     |      |  | 645.71  | 1289.40 | 1289.68 | -0.27 | 0 | 39  | 0.0054   | R.LIPAGTYGAYHK.T                   |               |
|               |                                   |      |     |      |  | 651.75  | 1301.48 | 1301.68 | -0.21 | 0 | 109 | 3.6e-010 | R.SSELAIDELGR.E                    |               |
|               |                                   |      |     |      |  | 654.82  | 1307.62 | 1307.78 | -0.16 | 0 | 59  | 2.3e-005 | R.LLDLAAPDHVR.N                    |               |
|               |                                   |      |     |      |  | 657.72  | 1313.42 | 1313.63 | -0.21 | 0 | 84  | 9.7e-008 | R.FATSDLDNLYR.R                    |               |
|               |                                   |      |     |      |  | 692.74  | 1383.47 | 1383.65 | -0.19 | 0 | 77  | 4.9e-007 | K.FVDMIDGVTMTR.Q                   |               |
|               |                                   |      |     |      |  | 695.20  | 1388.38 | 1388.68 | -0.30 | 0 | 55  | 7.9e-005 | R.ITETIIDENGR.S                    |               |
|               |                                   |      |     |      |  | 757.26  | 1512.50 | 1512.86 | -0.35 | 0 | 56  | 5.9e-005 | R.LGIQAFEPVLEGG.A                  |               |
|               |                                   |      |     |      |  | 780.66  | 1559.31 | 1559.76 | -0.46 | 0 | 46  | 0.00073  | R.MLQESVDALLDNGR.R                 |               |
|               |                                   |      |     |      |  | 788.65  | 1575.28 | 1575.69 | -0.42 | 0 | 70  | 5.5e-006 | R.GEGMYFMSVAEVEK.A                 |               |
|               |                                   |      |     |      |  | 804.63  | 1607.24 | 1607.76 | -0.53 | 0 | 95  | 1.6e-008 | K.AMMENLSTETVINR.D                 |               |
|               |                                   |      |     |      |  | 831.63  | 1661.25 | 1661.84 | -0.58 | 0 | 75  | 7.5e-007 | R.GEVIADGPEAAHDILR.L               |               |
|               |                                   |      |     |      |  | 836.20  | 1670.38 | 1670.85 | -0.47 | 0 | 92  | 1.8e-008 | R.EVAEVDVLDDEVIR.E                 |               |
|               |                                   |      |     |      |  | 602.27  | 1803.80 | 1803.93 | -0.13 | 0 | 47  | 0.001    | R.EGLNVLQYFISTHGARK                |               |
|               |                                   |      |     |      |  | 973.63  | 1945.25 | 1946.01 | -0.76 | 0 | 71  | 1.6e-006 | R.VVAVDVFPYGTEDVLAPR.N             |               |
|               |                                   |      |     |      |  | 655.96  | 1964.86 | 1964.03 | 0.82  | 0 | 73  | 2e-006   | R.MGHIELASPVAHWFLK.S               |               |
|               |                                   |      |     |      |  | 995.55  | 1989.08 | 1988.98 | 0.11  | 0 | 66  | 6e-006   | R.LVITPADGGQEYEMIPK.W              | Oxidation (M) |
|               |                                   |      |     |      |  | 674.96  | 2021.86 | 2022.20 | -0.34 | 0 | 35  | 0.0076   | K.VLPVLPDLRPLVPLDGGRF              |               |
|               |                                   |      |     |      |  | 1018.60 | 2035.19 | 2036.01 | -0.83 | 0 | 60  | 2.4e-005 | R.YATISGASVGDMMVPAEK.Y             |               |
|               |                                   |      |     |      |  | 701.87  | 2102.57 | 2102.05 | 0.52  | 0 | 65  | 1.5e-005 | R.GHNVANVIVNEVDVYR.L               |               |
|               |                                   |      |     |      |  | 709.93  | 2126.76 | 2128.13 | -1.37 | 0 | 56  | 8e-005   | R.GLMAKPDGSHETPIVANFRE             |               |
|               |                                   |      |     |      |  | 725.23  | 2172.66 | 2172.05 | 0.61  | 0 | 30  | 0.053    | K.ITASEAEQNLADLLNLAGSQD.-          |               |
|               |                                   |      |     |      |  | 714.74  | 2854.91 | 2855.47 | -0.56 | 0 | 48  | 0.00042  | R.GHINHGEAIGVVAQAQSIGEPQTLTMR.T    |               |
|               |                                   |      |     |      |  | 1022.77 | 3065.28 | 3065.52 | -0.24 | 0 | 114 | 2.3e-010 | K.YTLVADAEAEVLEIQEQFQSGLVTAGERY    |               |
|               |                                   |      |     |      |  | 828.59  | 3310.31 | 3311.67 | -1.35 | 0 | 29  | 0.03     | K.LEEASVEAGDIANWDPHTHPITTEVAGSIK.F |               |
| <b>SO0224</b> | DNA-directed RNA polymerase, rpoB | 1431 | 150 | 32.0 |  | 521.25  | 1040.49 | 1040.60 | -0.11 | 0 | 59  | 2.2e-005 | R.ISALPGGLTR.E                     |               |
|               |                                   |      |     |      |  | 576.15  | 1150.29 | 1150.56 | -0.28 | 0 | 35  | 0.015    | R.GGVIDYVDASRI                     |               |
|               |                                   |      |     |      |  | 608.67  | 1215.33 | 1215.61 | -0.28 | 0 | 46  | 0.0014   | K.DAEGTGLVEAGR.R                   |               |
|               |                                   |      |     |      |  | 634.17  | 1266.32 | 1266.57 | -0.24 | 0 | 69  | 2.3e-006 | R.SVGEMAENQFR.V                    |               |
|               |                                   |      |     |      |  | 637.25  | 1272.48 | 1272.67 | -0.20 | 0 | 49  | 0.00032  | K.DTLVMTLVPER.L                    |               |
|               |                                   |      |     |      |  | 650.74  | 1299.47 | 1299.68 | -0.22 | 0 | 50  | 0.00026  | K.GGIPVATPAFDGAK.E                 |               |
|               |                                   |      |     |      |  | 654.24  | 1306.46 | 1306.66 | -0.20 | 1 | 38  | 0.0033   | K.RGGVIDYVDASRI                    |               |
|               |                                   |      |     |      |  | 663.71  | 1325.41 | 1325.72 | -0.31 | 0 | 62  | 1.5e-005 | K.ITQGDLDLAPGVLK.I                 |               |
|               |                                   |      |     |      |  | 670.73  | 1339.45 | 1339.61 | -0.16 | 0 | 64  | 1.1e-005 | R.GSWLDFEFDPK.D                    |               |
|               |                                   |      |     |      |  | 708.69  | 1415.36 | 1415.71 | -0.35 | 0 | 48  | 0.00049  | R.LSPDDEGSGVLSK.E                  |               |
|               |                                   |      |     |      |  | 724.20  | 1446.38 | 1446.68 | -0.30 | 0 | 71  | 2.5e-006 | R.TNSYGFLETPYR.K                   |               |
|               |                                   |      |     |      |  | 727.74  | 1453.46 | 1453.81 | -0.35 | 1 | 42  | 0.0017   | R.KITQGDLDLAPGVLK.I                |               |
|               |                                   |      |     |      |  | 732.14  | 1462.27 | 1462.71 | -0.43 | 0 | 88  | 5.2e-008 | K.QVYELGDEVQQR.V                   |               |
|               |                                   |      |     |      |  | 736.22  | 1470.42 | 1470.79 | -0.38 | 1 | 88  | 4.3e-008 | R.KDVLVQVIDEAK.Q                   |               |
|               |                                   |      |     |      |  | 755.79  | 1509.57 | 1509.76 | -0.19 | 0 | 43  | 0.00095  | R.AIEIEMHIAQAR.K                   |               |
|               |                                   |      |     |      |  | 769.18  | 1536.34 | 1536.73 | -0.39 | 0 | 85  | 1e-007   | R.VDIDSFTDDELLR.L                  |               |
|               |                                   |      |     |      |  | 793.23  | 1584.44 | 1584.85 | -0.41 | 0 | 76  | 5.7e-007 | K.QMLELAGLPTSGQLK.L                |               |
|               |                                   |      |     |      |  | 804.59  | 1607.17 | 1607.75 | -0.58 | 0 | 70  | 2.2e-006 | K.SFSGNSELQVVSYYK.L                |               |
|               |                                   |      |     |      |  | 811.65  | 1621.28 | 1621.83 | -0.55 | 0 | 73  | 1.3e-006 | R.STGSYSLVTQQPLGGK.A               |               |
|               |                                   |      |     |      |  | 572.89  | 1715.64 | 1714.75 | 0.88  | 0 | 36  | 0.0054   | R.NGFDEVDDIDHLGNR.R                |               |
|               |                                   |      |     |      |  | 896.15  | 1790.28 | 1790.93 | -0.65 | 0 | 48  | 0.00037  | K.TNTTELEVPEYIVGKY                 |               |
|               |                                   |      |     |      |  | 608.90  | 1823.68 | 1823.89 | -0.21 | 0 | 38  | 0.0088   | K.QTELEQLAEQHEELK.A                |               |
|               |                                   |      |     |      |  | 624.26  | 1869.76 | 1870.03 | -0.27 | 0 | 50  | 0.00048  | R.NLLSAGFSEAQIALLPR.K              |               |
|               |                                   |      |     |      |  | 987.09  | 1972.17 | 1972.98 | -0.80 | 0 | 83  | 1.1e-007 | R.ALEYSTQEILDFFER.V                |               |
|               |                                   |      |     |      |  | 1015.09 | 2028.17 | 2029.02 | -0.86 | 0 | 59  | 3e-005   | K.LGSEETADIPNVGESALSKL             |               |
|               |                                   |      |     |      |  | 731.54  | 2191.60 | 2192.08 | -0.49 | 0 | 28  | 0.041    | K.VVDGVITDEVEYLSAIEEGRY            |               |
|               |                                   |      |     |      |  | 748.93  | 2243.76 | 2244.25 | -0.49 | 0 | 69  | 3.9e-006 | K.RPQVLDIPYLLSIQLDSFK.K            |               |
|               |                                   |      |     |      |  | 749.18  | 2244.53 | 2245.12 | -0.59 | 0 | 97  | 6.4e-009 | K.VNEDELPRGEGADIDYLNLT.KY          |               |
|               |                                   |      |     |      |  | 774.18  | 2319.52 | 2320.18 | -0.66 | 1 | 52  | 0.00016  | R.KVVDGVITDEVEYLSAIEEGRY           |               |
|               |                                   |      |     |      |  | 800.86  | 2399.56 | 2401.14 | -1.58 | 0 | 29  | 0.07     | R.IAFMPWNGYNFEDSILISER.V           |               |
|               |                                   |      |     |      |  | 808.15  | 2421.44 | 2422.20 | -0.76 | 0 | 40  | 0.0055   | K.ELSTLYINELDHGAYISDTLR.I          |               |
|               |                                   |      |     |      |  | 823.46  | 2467.36 | 2467.20 | 0.16  | 0 | 44  | 0.0018   | K.NIVDGNHMQMPESFNVLK.E             |               |
| <b>SO1490</b> | alcohol dehydrogenase II, AdhB    | 987  | 40  | 55.0 |  | 537.21  | 1072.40 | 1072.54 | -0.14 | 0 | 75  | 7.2e-007 | K.GAVDDAIGDIK.T                    |               |

|        |                                        |     |     |      |         |         |         |       |   |     |          |                                     |               |
|--------|----------------------------------------|-----|-----|------|---------|---------|---------|-------|---|-----|----------|-------------------------------------|---------------|
|        |                                        |     |     |      | 562.73  | 1123.44 | 1123.53 | -0.09 | 0 | 37  | 0.0038   | R.FCIITDEAR.H                       |               |
|        |                                        |     |     |      | 601.24  | 1200.46 | 1199.69 | 0.77  | 0 | 38  | 0.0042   | K.GIALVATNGGSIK.D                   |               |
|        |                                        |     |     |      | 610.83  | 1219.65 | 1219.70 | -0.05 | 0 | 38  | 0.0041   | K.FFIPSVNVLGK.G                     |               |
|        |                                        |     |     |      | 685.73  | 1369.45 | 1369.71 | -0.26 | 0 | 59  | 2.7e-005 | K.AEDIPTLADNALK.D                   |               |
|        |                                        |     |     |      | 741.26  | 1480.50 | 1480.86 | -0.36 | 0 | 102 | 1.2e-009 | K.AIELIQGNLVNAV.K                   |               |
|        |                                        |     |     |      | 753.67  | 1505.32 | 1505.74 | -0.42 | 0 | 123 | 1.4e-011 | K.MTDEQGAAAAITAIK.T                 | Oxidation (M) |
|        |                                        |     |     |      | 858.62  | 1715.23 | 1715.83 | -0.60 | 0 | 35  | 0.007    | K.QATHAEICQIFTNAL.-                 |               |
|        |                                        |     |     |      | 608.63  | 1822.85 | 1822.95 | -0.10 | 0 | 62  | 3.5e-005 | K.HTTPILSVNDPELMLK.K                | Oxidation (M) |
|        |                                        |     |     |      | 711.48  | 2131.40 | 2131.94 | -0.54 | 0 | 78  | 3.6e-007 | K.ANQCDQFVILGGGSPHCAK.G             |               |
|        |                                        |     |     |      | 726.58  | 2176.72 | 2177.27 | -0.55 | 0 | 61  | 2.6e-005 | R.ALIVTDFKPLVNIPLVGEVAEK.L          |               |
|        |                                        |     |     |      | 796.50  | 2386.48 | 2386.25 | 0.23  | 0 | 60  | 4e-005   | K.STKPQLPLVAINTTAGTASEMTR.F         |               |
|        |                                        |     |     |      | 1037.10 | 3108.28 | 3108.65 | -0.36 | 0 | 94  | 1.6e-008 | K.LQGNGITSTVFDGVQPNPTVGNVEAGLALLK.A |               |
| S00229 | translation elongation factor Tu, TufA | 928 | 43  | 54.0 | 593.25  | 1184.49 | 1184.64 | -0.15 | 0 | 122 | 1.3e-011 | R.VGDEVEIVGIR.T                     |               |
|        |                                        |     |     |      | 629.73  | 1257.45 | 1257.59 | -0.14 | 0 | 41  | 0.0018   | K.ALEGEPEWEAK.I                     |               |
|        |                                        |     |     |      | 663.31  | 1324.60 | 1324.77 | -0.17 | 0 | 85  | 7.2e-008 | K.TTLTAAISHVLAK.T                   |               |
|        |                                        |     |     |      | 710.66  | 1419.31 | 1419.63 | -0.32 | 0 | 68  | 5.8e-006 | K.DFSQIDNAPEER.E                    |               |
|        |                                        |     |     |      | 754.26  | 1506.50 | 1506.83 | -0.33 | 0 | 29  | 0.056    | R.QVGVFFIIVFMNK.C                   |               |
|        |                                        |     |     |      | 590.22  | 1767.62 | 1767.78 | -0.16 | 0 | 47  | 0.00088  | R.HYAHVDCPGHADYVK.N                 |               |
|        |                                        |     |     |      | 902.09  | 1802.17 | 1802.88 | -0.71 | 0 | 87  | 4.9e-008 | R.GITINTSHIEYDTPSR.H                |               |
|        |                                        |     |     |      | 917.74  | 1833.46 | 1832.92 | 0.54  | 0 | 92  | 1.5e-008 | K.MVVTLICPIAMDEGLR.F                | Oxidation (M) |
|        |                                        |     |     |      | 950.13  | 1898.25 | 1899.00 | -0.75 | 0 | 52  | 0.00016  | K.ILELAAALDSYIPEPER.D               |               |
|        |                                        |     |     |      | 732.25  | 2193.72 | 2194.10 | -0.38 | 0 | 68  | 6.7e-006 | R.DIDKPFLMPIEDVFSISGR.G             |               |
|        |                                        |     |     |      | 802.56  | 2404.65 | 2405.20 | -0.55 | 0 | 81  | 4.5e-007 | R.ELLESEYDFPGDDLPIVIGSALK.A         |               |
|        |                                        |     |     |      | 859.79  | 2576.35 | 2577.22 | -0.86 | 0 | 72  | 2.7e-006 | R.TTDVVTGTELPEGVEMVMPGDNIK.M        | Oxidation (M) |
|        |                                        |     |     |      | 906.35  | 2716.02 | 2716.41 | -0.39 | 0 | 36  | 0.0063   | R.GQVLSKPGSINPHTTFESEVYVLSKE        |               |
| S00217 | translation elongation factor Tu, TufB | 888 | 43  | 53.0 | 593.25  | 1184.49 | 1184.64 | -0.15 | 0 | 122 | 1.3e-011 | R.VGDEVEIVGIR.T                     |               |
|        |                                        |     |     |      | 629.73  | 1257.45 | 1257.59 | -0.14 | 0 | 41  | 0.0018   | K.ALEGEPEWEAK.I                     |               |
|        |                                        |     |     |      | 663.31  | 1324.60 | 1324.77 | -0.17 | 0 | 85  | 7.2e-008 | K.TTLTAAISHVLAK.T                   |               |
|        |                                        |     |     |      | 710.66  | 1419.31 | 1419.63 | -0.32 | 0 | 68  | 5.8e-006 | K.DFSQIDNAPEER.E                    |               |
|        |                                        |     |     |      | 754.26  | 1506.50 | 1506.83 | -0.33 | 0 | 29  | 0.056    | R.QVGVFFIIVFMNK.C                   |               |
|        |                                        |     |     |      | 794.16  | 1586.30 | 1586.82 | -0.51 | 0 | 74  | 1.4e-006 | K.VTLICPIAMDEGLR.F                  |               |
|        |                                        |     |     |      | 590.22  | 1767.62 | 1767.78 | -0.16 | 0 | 47  | 0.00088  | R.HYAHVDCPGHADYVK.N                 |               |
|        |                                        |     |     |      | 902.09  | 1802.17 | 1802.88 | -0.71 | 0 | 87  | 4.9e-008 | R.GITINTSHIEYDTPSR.H                |               |
|        |                                        |     |     |      | 950.13  | 1898.25 | 1899.00 | -0.75 | 0 | 52  | 0.00016  | K.ILELAAALDSYIPEPER.D               |               |
|        |                                        |     |     |      | 732.25  | 2193.72 | 2194.10 | -0.38 | 0 | 68  | 6.7e-006 | R.DIDKPFLMPIEDVFSISGR.G             |               |
|        |                                        |     |     |      | 802.56  | 2404.65 | 2405.20 | -0.55 | 0 | 81  | 4.5e-007 | R.ELLESEYDFPGDDLPIVIGSALK.A         |               |
|        |                                        |     |     |      | 859.79  | 2576.35 | 2577.22 | -0.86 | 0 | 72  | 2.7e-006 | R.TTDVVTGTELPEGVEMVMPGDNIK.M        | Oxidation (M) |
|        |                                        |     |     |      | 906.35  | 2716.02 | 2716.41 | -0.39 | 0 | 36  | 0.0063   | R.GQVLSKPGSINPHTTFESEVYVLSKE        |               |
| S04749 | ATP synthase F1, alpha subunit         | 467 | 55  | 23.0 | 621.19  | 1240.37 | 1240.67 | -0.30 | 0 | 25  | 0.06     | R.VVNTLGEPIDGK.G                    |               |
|        |                                        |     |     |      | 658.16  | 1314.31 | 1315.69 | -1.38 | 0 | 54  | 0.0002   | K.TAMAIDAHNQR.D                     |               |
|        |                                        |     |     |      | 661.25  | 1320.48 | 1321.65 | -1.17 | 0 | 86  | 7.3e-008 | R.IEQFEVVSER.N                      |               |
|        |                                        |     |     |      | 722.18  | 1442.35 | 1442.77 | -0.42 | 0 | 106 | 8.8e-010 | R.NEGTIVAVSDGHIR.I                  |               |
|        |                                        |     |     |      | 777.05  | 1552.08 | 1552.73 | -0.65 | 0 | 59  | 5.6e-005 | R.EAYPGDVFLHSR.L                    |               |
|        |                                        |     |     |      | 928.56  | 1855.11 | 1855.86 | -0.75 | 0 | 56  | 5.2e-005 | R.ELAAFSQFASDLLDATRA                |               |
|        |                                        |     |     |      | 661.44  | 1981.29 | 1981.00 | 0.29  | 0 | 61  | 3.9e-005 | K.QYAPMSVAAQAVSIFAEEK.G             |               |
|        |                                        |     |     |      | 760.24  | 2277.71 | 2278.13 | -0.42 | 0 | 106 | 6.6e-010 | K.VGDFEAALLSYMNSEHAALIKL            |               |
| S01142 | carbamoyl-phosphate synthase, CarB     | 321 | 119 | 9.0  | 680.25  | 1358.49 | 1358.76 | -0.27 | 0 | 63  | 1.1e-005 | K.GVIVQYGGQTPLK.L                   |               |
|        |                                        |     |     |      | 708.23  | 1414.45 | 1414.77 | -0.32 | 0 | 41  | 0.0043   | K.ELLIDESLIGWK.E                    |               |
|        |                                        |     |     |      | 746.15  | 1490.29 | 1490.72 | -0.43 | 0 | 83  | 1.6e-007 | K.NNEIYMIEVNPRA                     |               |
|        |                                        |     |     |      | 819.16  | 1636.31 | 1636.83 | -0.53 | 0 | 72  | 1.6e-006 | R.TPASFEPAIDYVVTKV                  |               |
|        |                                        |     |     |      | 623.56  | 1867.66 | 1867.89 | -0.23 | 0 | 45  | 0.00073  | R.HGLDPITDMSKPEAMAR.I               |               |
|        |                                        |     |     |      | 961.09  | 1920.17 | 1920.96 | -0.79 | 0 | 50  | 0.00046  | K.LAVGFTLDELMDITGGR.T               |               |
|        |                                        |     |     |      | 967.69  | 1933.36 | 1934.04 | -0.68 | 0 | 66  | 6.5e-006 | R.LYFEPVTLLEDVLEIVR.I               |               |
| S04747 | ATP synthase F1, beta subunit          | 238 | 50  | 15.0 | 683.77  | 1365.52 | 1365.73 | -0.21 | 0 | 58  | 2.8e-005 | R.DVLLFVDNIYR.Y                     |               |
|        |                                        |     |     |      | 725.72  | 1449.43 | 1449.78 | -0.35 | 0 | 98  | 3.5e-009 | R.YTLAGTEVSALLGR.M 597              |               |
|        |                                        |     |     |      | 774.46  | 2320.35 | 2321.10 | -0.76 | 0 | 28  | 0.075    | R.MPSAVGYQPTLAEEMGVLQER.I           | Oxidation (M) |
|        |                                        |     |     |      | 994.10  | 2979.27 | 2980.42 | -1.14 | 0 | 66  | 1.3e-005 | K.GILSGFDHIPEQAFYMVGSIDEAVEKA       |               |
| S02638 | leucine dehydrogenase, Ldh             | 170 | 37  | 14.0 | 757.64  | 1513.27 | 1513.77 | -0.50 | 0 | 96  | 7.9e-009 | K.IVAGCANNQLAEVR.H                  |               |
|        |                                        |     |     |      | 862.13  | 1722.26 | 1722.88 | -0.63 | 0 | 66  | 1.1e-005 | K.SGDPSPFTALGTYLGIK.A               |               |
|        |                                        |     |     |      | 611.93  | 1832.77 | 1832.97 | -0.20 | 0 | 36  | 0.0098   | K.AIIAHTNLGPAVGGCRM                 |               |

|                |                                        |     |     |      |        |         |         |       |   |    |          |                                  |
|----------------|----------------------------------------|-----|-----|------|--------|---------|---------|-------|---|----|----------|----------------------------------|
| <b>S00314</b>  | ornithine decarboxylase, SpeF          | 161 | 82  | 7.0  | 731.76 | 1461.50 | 1461.77 | -0.27 | 0 | 52 | 0.0003   | K.FLLTTPGIDAETGKY                |
|                |                                        |     |     |      | 777.21 | 1552.40 | 1552.74 | -0.34 | 0 | 59 | 3e-005   | R.QFFDFFGTIFR.S                  |
|                |                                        |     |     |      | 780.66 | 1559.31 | 1560.76 | -1.46 | 0 | 46 | 0.00067  | K.VMDPQEANLEFIR.G                |
|                |                                        |     |     |      | 845.16 | 1688.30 | 1688.91 | -0.61 | 0 | 34 | 0.011    | K.LGDLLEHGAPLDAQKY               |
| <b>S03032</b>  | NTP-dependent alcaligin synthetase     | 160 | 69  | 7.0  | 577.24 | 1152.47 | 1151.60 | 0.87  | 0 | 50 | 0.00046  | R.TFFNLSAPQK.C                   |
|                |                                        |     |     |      | 651.72 | 1301.43 | 1301.73 | -0.30 | 0 | 48 | 0.00039  | K.LITPQIYAQGA.V                  |
|                |                                        |     |     |      | 674.82 | 1347.63 | 1347.69 | -0.07 | 0 | 64 | 2.3e-005 | R.FAGGLDNPLAAFR.Q                |
|                |                                        |     |     |      | 790.18 | 1578.34 | 1579.70 | -1.36 | 0 | 60 | 4.8e-005 | R.YYEEALTQDSAYK.K                |
| <b>SOA0112</b> | Lipoprotein, putative                  | 117 | 146 | 1.0  | 699.24 | 1396.47 | 1396.74 | -0.26 | 0 | 73 | 1.2e-006 | K.VIYSTNNAFAAVK.E                |
|                |                                        |     |     |      | 720.16 | 1438.30 | 1438.72 | -0.42 | 0 | 27 | 0.11     | K.QGATGITYTPGAFR.G               |
| <b>S01521</b>  | conserved hypothetical protein         | 100 | 103 | 6.0  | 675.72 | 1349.42 | 1349.60 | -0.19 | 0 | 37 | 0.0095   | R.FAWSTDASYFR.I                  |
|                |                                        |     |     |      | 684.42 | 1366.82 | 1367.80 | -0.98 | 0 | 44 | 0.0017   | R.TLPEVVVTLER.A                  |
|                |                                        |     |     |      | 753.25 | 1504.49 | 1505.79 | -1.31 | 0 | 58 | 3.7e-005 | K.IPVLVDALSCTYR.T                |
|                |                                        |     |     |      | 774.80 | 2321.38 | 2322.25 | -0.87 | 0 | 31 | 0.038    | R.AIPLINGESVSAEELLDWPSIKA        |
| <b>S03532</b>  | isoleucyl-tRNA synthetase, IleS        | 91  | 106 | 9.0  | 734.71 | 1467.41 | 1467.80 | -0.40 | 0 | 52 | 0.00018  | K.SIGNVIAPQVTK.NL                |
|                |                                        |     |     |      | 797.65 | 1593.29 | 1593.79 | -0.50 | 0 | 36 | 0.0062   | K.FTLNLPETEFPMR.G                |
|                |                                        |     |     |      | 955.14 | 1908.27 | 1909.01 | -0.74 | 0 | 37 | 0.0042   | R.ALSISPELDYSLVEFVK.D            |
|                |                                        |     |     |      | 690.95 | 2069.82 | 2070.11 | -0.29 | 0 | 30 | 0.026    | K.VLPLVDATSDAVETELASLK.L         |
|                |                                        |     |     |      | 800.43 | 3197.67 | 3197.55 | 0.13  | 0 | 25 | 0.072    | K.YGLEVANPVGDNVYKPDTEFFAGQHVFK.A |
| <b>S00021</b>  | fatty oxidation complex, alpha subunit | 86  | 77  | 5.0  | 723.75 | 1445.49 | 1445.76 | -0.27 | 0 | 43 | 0.0013   | R.ETLASLDAALDSIK.Q               |
|                |                                        |     |     |      | 731.94 | 2192.81 | 2193.21 | -0.40 | 0 | 70 | 5e-006   | K.VGAVDAVVAPEALEVAAIQMLK.D       |
| <b>S00256</b>  | DNA-directed RNA polymerase, RpoA      | 81  | 36  | 7.0  | 637.22 | 1272.42 | 1272.67 | -0.24 | 0 | 44 | 0.0012   | R.LVDIEQVNSTRA                   |
|                |                                        |     |     |      | 863.24 | 1724.47 | 1724.96 | -0.48 | 0 | 54 | 0.00019  | K.EGVQEDILEILLNLK.G              |
| <b>SO4030</b>  | excinuclease ABC, A subunit, UvrA      | 73  | 106 | 3.0  | 755.21 | 1508.40 | 1509.85 | -1.45 | 0 | 40 | 0.0054   | R.VITNPELSLGGAIR.G               |
|                |                                        |     |     |      | 816.16 | 1630.31 | 1629.82 | 0.48  | 0 | 57 | 0.00011  | R.STVGTITTEIYDYL.RL              |
| <b>S01295</b>  | major outer membrane lipoprotein       | 68  | 9   | 13.0 | 630.73 | 1259.45 | 1260.66 | -1.21 | 0 | 50 | 0.00049  | K.VDQLSADVSSLK.S                 |
| <b>S03440</b>  | enolase, Eno                           | 56  | 42  | 7.0  | 781.55 | 1561.08 | 1561.84 | -0.76 | 0 | 31 | 0.036    | K.IQLVGGDLFVNTKI                 |
|                |                                        |     |     |      | 817.58 | 1633.14 | 1632.88 | 0.25  | 0 | 47 | 0.00095  | K.FNQIGSLTETLAAIR.M              |
| <b>S01779</b>  | Decaheme cytochrome c, OmcA            | 41  | 80  | 2.0  | 650.21 | 1298.40 | 1299.62 | -1.23 | 0 | 33 | 0.027    | R.YAYIQDQPF.RF                   |
|                |                                        |     |     |      | 670.72 | 1339.43 | 1339.66 | -0.23 | 0 | 32 | 0.017    | K.TFTIDSTNSNLK.L                 |

Cell lysate / Anti-OmcA IP / MRN

| Gene          | Annotation                             | Mascot_Score | MW (kDa) | Coverage | Observed m/z | Mr(expt) | Mr(calc) | Delta | Miss | Score | Expect   | Peptide                             | Var_Mod       |
|---------------|----------------------------------------|--------------|----------|----------|--------------|----------|----------|-------|------|-------|----------|-------------------------------------|---------------|
| <b>S00224</b> | DNA-directed RNA polymerase, rpoB      | 74           | 150      | 3.0      | 650.78       | 1299.54  | 1299.68  | -0.14 | 0    | 35    | 0.0088   | K.GGIVATPAFDGAK.E                   |               |
|               |                                        |              |          |          | 724.23       | 1446.44  | 1446.68  | -0.24 | 0    | 50    | 0.00062  | R.TNSYGFLETPYR.K                    |               |
|               |                                        |              |          |          | 811.67       | 1621.32  | 1621.83  | -0.51 | 0    | 28    | 0.074    | R.STGSYSLVTQPLGGKA                  |               |
| <b>S00229</b> | translation elongation factor Tu, TufA | 359          | 43       | 21.0     | 593.79       | 1185.57  | 1184.64  | 0.93  | 0    | 104   | 8.3e-010 | R.VGDEVEIVGIR.T                     |               |
|               |                                        |              |          |          | 909.73       | 1817.44  | 1816.92  | 0.52  | 0    | 28    | 0.09     | K.MVVTLICPIAMDEGLR.F                |               |
|               |                                        |              |          |          | 950.15       | 1898.29  | 1899.00  | -0.71 | 0    | 35    | 0.0079   | K.ILELAAALDSYIPEPER.D               |               |
|               |                                        |              |          |          | 732.27       | 2193.79  | 2194.10  | -0.31 | 0    | 47    | 0.00087  | R.DIDKPF <del>M</del> PIEDVFSISGR.G | Oxidation (M) |
|               |                                        |              |          |          | 802.54       | 2404.61  | 2405.20  | -0.59 | 0    | 53    | 0.00011  | R.ELLSEYDFPGDDLPIVIGSALK.A          |               |
| <b>S00217</b> | translation elongation factor Tu, TufB | 367          | 43       | 21.0     | 593.79       | 1185.57  | 1184.64  | 0.93  | 0    | 104   | 8.3e-010 | R.VGDEVEIVGIR.T                     |               |
|               |                                        |              |          |          | 802.65       | 1603.29  | 1602.81  | 0.48  | 0    | 38    | 0.0099   | K.VTLICPIAMDEGLR.F                  | Oxidation (M) |
|               |                                        |              |          |          | 950.15       | 1898.29  | 1899.00  | -0.71 | 0    | 35    | 0.0079   | K.ILELAAALDSYIPEPER.D               |               |
|               |                                        |              |          |          | 732.27       | 2193.79  | 2194.10  | -0.31 | 0    | 47    | 0.00087  | R.DIDKPF <del>M</del> PIEDVFSISGR.G | Oxidation (M) |
|               |                                        |              |          |          | 802.54       | 2404.61  | 2405.20  | -0.59 | 0    | 53    | 0.00011  | R.ELLSEYDFPGDDLPIVIGSALK.A          |               |
| <b>S01142</b> | carbamoyl-phosphate synthase, CarB     | 88           | 119      | 3.0      | 680.25       | 1358.48  | 1358.76  | -0.27 | 0    | 38    | 0.0043   | K.GVIVQYGGQTP <del>L</del> K.L      |               |
|               |                                        |              |          |          | 746.75       | 1491.49  | 1490.72  | 0.77  | 0    | 36    | 0.011    | K.NNEIYMI <del>E</del> VNPR.A       |               |
|               |                                        |              |          |          | 819.20       | 1636.38  | 1636.83  | -0.45 | 0    | 58    | 4.6e-005 | R.TPASFEPAIDYVVTK.V                 |               |
| <b>SO4747</b> | ATP synthase F1, beta subunit          | 45           | 50       | 5.0      | 683.61       | 1365.20  | 1365.73  | -0.53 | 0    | 39    | 0.006    | R.DVLLFVDNIYR.Y                     |               |
|               |                                        |              |          |          | 726.38       | 1450.76  | 1449.78  | 0.97  | 0    | 33    | 0.025    | R.YTLAGTEVSALLGR.M                  |               |
| <b>S00314</b> | ornithine decarboxylase, SpeF          | 130          | 82       | 8.0      | 731.74       | 1461.46  | 1461.77  | -0.31 | 0    | 44    | 0.0011   | K.FLLTTPGIDAETGKY                   |               |
|               |                                        |              |          |          | 755.76       | 1509.51  | 1509.82  | -0.30 | 0    | 38    | 0.0031   | R.GNVELVPLSQIEGR.I                  |               |
|               |                                        |              |          |          | 781.23       | 1560.44  | 1560.76  | -0.32 | 0    | 55    | 7.2e-005 | K.VMDPQEANLEFIR.G                   |               |
|               |                                        |              |          |          | 733.95       | 2198.84  | 2199.11  | -0.27 | 0    | 39    | 0.0032   | K.LVDEDAPLSEVLPNVYANK.A             |               |
| <b>S01295</b> | major outer membrane lipoprotein       | 138          | 9        | 13.0     | 630.81       | 1259.60  | 1260.66  | -1.06 | 0    | 65    | 8.7e-006 | K.VDQLSADVSSLK.S                    |               |
| <b>S01779</b> | OmcA                                   | 140          | 80       | 4.0      | 537.33       | 1072.64  | 1072.63  | 0.02  | 0    | 70    | 4.8e-006 | R.FGIAQLTPVK.E                      |               |
|               |                                        |              |          |          | 650.53       | 1299.04  | 1299.62  | -0.58 | 0    | 50    | 0.0006   | R.YAYIQDQPF.RF                      |               |
|               |                                        |              |          |          | 671.26       | 1340.51  | 1339.66  | 0.85  | 0    | 41    | 0.0037   | K.TFTIDSTNSNLK.L                    |               |



| A1      |                                   | Gene    | Annotation | Mascot Score | Mass (kDa) | Coverage                          | Observed m/z | Mr(expt)   | Mr(calc)     | Delta      | Miss     | Score                       | Expect        | Peptide  | Var_Mod |          |                    |               |         |         |
|---------|-----------------------------------|---------|------------|--------------|------------|-----------------------------------|--------------|------------|--------------|------------|----------|-----------------------------|---------------|----------|---------|----------|--------------------|---------------|---------|---------|
|         |                                   |         |            |              |            |                                   |              |            |              |            |          |                             |               |          |         |          |                    |               |         |         |
| SO0224  | DNA-directed RNA polymerase, RpoB | 1067    | 150        | 24.0         | 521.42     | 1040.83                           | 1040.60      | 0.23       | 0            | 26         | 0.037    | R.ISALGPGGLTR.E             |               |          |         |          |                    |               |         |         |
|         |                                   |         |            |              | 553.39     | 1104.76                           | 1104.62      | 0.15       | 0            | 50         | 0.00019  | R.LEALVEIYR.M               |               |          |         |          |                    |               |         |         |
|         |                                   |         |            |              | 634.27     | 1266.52                           | 1266.57      | -0.04      | 0            | 50         | 0.00013  | R.SVGEAENQFR.V              |               |          |         |          |                    |               |         |         |
|         |                                   |         |            |              | 637.31     | 1272.60                           | 1272.67      | -0.08      | 0            | 50         | 0.00017  | K.DTLVMTLVPER.L             |               |          |         |          |                    |               |         |         |
|         |                                   |         |            |              | 650.80     | 1299.58                           | 1299.68      | -0.10      | 0            | 40         | 0.0016   | K.GGIPVATPAFDGAK.E          |               |          |         |          |                    |               |         |         |
|         |                                   |         |            |              | 663.82     | 1325.62                           | 1325.72      | -0.10      | 0            | 65         | 7.2e-006 | K.ITQDDDLAPGVK.I            |               |          |         |          |                    |               |         |         |
|         |                                   |         |            |              | 670.75     | 1339.48                           | 1339.61      | -0.12      | 0            | 68         | 3.3e-006 | R.GSWLDFEFDPK.D             |               |          |         |          |                    |               |         |         |
|         |                                   |         |            |              | 708.79     | 1415.57                           | 1415.71      | -0.14      | 0            | 50         | 0.00021  | R.LSIPDDEGSGVLSK.E          |               |          |         |          |                    |               |         |         |
|         |                                   |         |            |              | 724.28     | 1446.55                           | 1446.68      | -0.13      | 0            | 70         | 2.1e-006 | R.TNSYGFLETPYR.K            |               |          |         |          |                    |               |         |         |
|         |                                   |         |            |              | 732.26     | 1462.50                           | 1462.71      | -0.21      | 0            | 79         | 2e-007   | K.QVVELGDEVQQR.V            |               |          |         |          |                    |               |         |         |
|         |                                   |         |            |              | 736.31     | 1470.61                           | 1470.79      | -0.19      | 1            | 30         | 0.019    | R.KDVLVQVIDEAK.Q            |               |          |         |          |                    |               |         |         |
|         |                                   |         |            |              | 769.25     | 1536.48                           | 1536.73      | -0.26      | 0            | 79         | 1.8e-007 | R.VDIDSFTDDELLR.L           |               |          |         |          |                    |               |         |         |
|         |                                   |         |            |              | 793.29     | 1584.57                           | 1584.85      | -0.28      | 0            | 31         | 0.01     | K.QMLELAGLPTSGQLK.L         |               |          |         |          |                    |               |         |         |
|         |                                   |         |            |              | 804.71     | 1607.41                           | 1607.75      | -0.34      | 0            | 75         | 5.8e-007 | K.SFSGNSELQVVSYK.L          |               |          |         |          |                    |               |         |         |
|         |                                   |         |            |              | 811.71     | 1621.41                           | 1621.83      | -0.42      | 0            | 28         | 0.026    | R.STGSYSLVTQPLGGK.A         |               |          |         |          |                    |               |         |         |
|         |                                   |         |            |              | 896.21     | 1790.40                           | 1790.93      | -0.53      | 0            | 25         | 0.053    | K.TNTTTELEVPEYIVGKY         |               |          |         |          |                    |               |         |         |
|         |                                   |         |            |              | 935.76     | 1869.51                           | 1870.03      | -0.52      | 0            | 26         | 0.054    | R.NLLSAGFSEAQIALPR.K        |               |          |         |          |                    |               |         |         |
|         |                                   |         |            |              | 943.64     | 1885.27                           | 1885.88      | -0.62      | 0            | 80         | 1.4e-007 | K.DAAEALFQNLFFSEERY         |               |          |         |          |                    |               |         |         |
|         |                                   |         |            |              | 743.92     | 2228.73                           | 2230.05      | -1.32      | 0            | 30         | 0.012    | R.GDVLADGPSTDLGDLALGQNM.R.I | Oxidation (M) |          |         |          |                    |               |         |         |
|         |                                   |         |            |              | 749.26     | 2244.77                           | 2245.12      | -0.35      | 0            | 27         | 0.025    | K.VNEDELRPGEAGIDIYNLT.K.Y   |               |          |         |          |                    |               |         |         |
|         |                                   |         |            |              | 774.59     | 2320.74                           | 2320.18      | 0.56       | 1            | 53         | 0.00016  | R.KVVDGVITDEVEYLSAIEEGR.Y   |               |          |         |          |                    |               |         |         |
|         |                                   |         |            |              | 808.24     | 2421.70                           | 2422.20      | -0.51      | 0            | 63         | 1.5e-005 | K.ELSTLYINELDHGAVISDTLR.I   |               |          |         |          |                    |               |         |         |
|         |                                   |         |            |              | SO0225     | DNA-directed RNA polymerase, RpoC | 873          | 156        | 17.0         | 521.46     | 1040.90  | 1041.62                     | -0.72         | 0        | 30      | 0.033    | R.SVITVPTLR.L      |               |         |         |
|         |                                   |         |            |              |            |                                   |              |            |              | 527.92     | 1053.82  | 1053.62                     | 0.20          | 0        | 52      | 0.00011  | K.IGLASPDILR.S     |               |         |         |
|         |                                   |         |            |              |            |                                   |              |            |              | 597.33     | 1192.65  | 1193.61                     | -0.97         | 0        | 45      | 0.0011   | R.IGLMLDMTLR.D     | Oxidation (M) |         |         |
|         |                                   |         |            |              |            |                                   |              |            |              | 609.45     | 1216.88  | 1216.65                     | 0.23          | 0        | 74      | 1.3e-006 | K.MGAEAVLELLR.A    |               |         |         |
|         |                                   |         |            |              |            |                                   |              |            |              | 623.33     | 1244.64  | 1244.64                     | -0.00         | 0        | 60      | 2e-005   | K.VIDIWASANEK.V    |               |         |         |
|         |                                   |         |            |              |            |                                   |              |            |              | 651.85     | 1301.69  | 1301.68                     | 0.00          | 0        | 79      | 2.4e-007 | R.SSELAHDELGR.E    |               |         |         |
| 654.89  | 1307.77                           | 1307.78 | -0.01      | 0            |            |                                   |              |            |              | 52         | 9e-005   | R.LLDLAAPDHVR.N             |               |          |         |          |                    |               |         |         |
| 657.81  | 1313.60                           | 1313.63 | -0.02      | 0            |            |                                   |              |            |              | 60         | 1.8e-005 | R.FATSDLNLYR.R              |               |          |         |          |                    |               |         |         |
| 695.28  | 1388.54                           | 1388.68 | -0.14      | 0            |            |                                   |              |            |              | 50         | 0.00016  | R.ITETIDENGR.S              |               |          |         |          |                    |               |         |         |
| 700.76  | 1399.50                           | 1399.65 | -0.15      | 0            |            |                                   |              |            |              | 29         | 0.023    | K.FVDMIDGVMTTR.Q            | Oxidation (M) |          |         |          |                    |               |         |         |
| 757.31  | 1512.61                           | 1512.86 | -0.24      | 0            |            |                                   |              |            |              | 38         | 0.0024   | R.LGIQAFEPVLIIEGK.A         |               |          |         |          |                    |               |         |         |
| 796.70  | 1591.39                           | 1591.69 | -0.30      | 0            |            |                                   |              |            |              | 40         | 0.0015   | R.GEGMYFMSVAEVEK.A          | Oxidation (M) |          |         |          |                    |               |         |         |
| 831.74  | 1661.46                           | 1661.84 | -0.38      | 0            |            |                                   |              |            |              | 32         | 0.009    | R.GEVIADGPEAAHDILR.L        |               |          |         |          |                    |               |         |         |
| 836.23  | 1670.45                           | 1670.85 | -0.40      | 0            |            |                                   |              |            |              | 61         | 1.4e-005 | R.EVAEVVDVLDDEVIR.E         |               |          |         |          |                    |               |         |         |
| 973.68  | 1945.35                           | 1946.01 | -0.66      | 0            |            |                                   |              |            |              | 71         | 1.1e-006 | R.VVAVDVFYPGTEDVLAPR.N      |               |          |         |          |                    |               |         |         |
| 1003.15 | 2004.29                           | 2004.97 | -0.69      | 0            |            |                                   |              |            |              | 25         | 0.058    | R.LVITPADGGEQYEEMLPK.W      | Oxidation (M) |          |         |          |                    |               |         |         |
| 682.03  | 2043.08                           | 2043.08 | -0.00      | 0            |            |                                   |              |            |              | 39         | 0.0038   | R.QTDELTLGLSSIVLDVQQR.G     |               |          |         |          |                    |               |         |         |
| 899.46  | 2695.35                           | 2696.17 | -0.82      | 0            |            |                                   |              |            |              | 38         | 0.0034   | R.GQMLTEETYLDALIEYGVDFEAK.M | Oxidation (M) |          |         |          |                    |               |         |         |
| SOa0110 | lipoprotein, putative             | 821     | 146        | 13.0         |            |                                   |              |            |              | 655.32     | 1308.62  | 1308.69                     | -0.08         | 0        | 78      | 4.6e-007 | K.VIDSTSSAFAAIK.E  |               |         |         |
|         |                                   |         |            |              |            |                                   |              |            |              | 669.36     | 1336.70  | 1336.72                     | -0.03         | 0        | 64      | 6.6e-006 | K.VIDSTTSFAFAVK.E  |               |         |         |
|         |                                   |         |            |              |            |                                   |              |            |              | 678.82     | 1355.62  | 1355.71                     | -0.09         | 0        | 71      | 1.2e-006 | K.VIYSNSSAFAAVK.Q  |               |         |         |
|         |                                   |         |            |              |            |                                   |              |            |              | 686.33     | 1370.65  | 1370.71                     | -0.06         | 0        | 26      | 0.032    | K.VIDSTYSFAFAVK.E  |               |         |         |
|         |                                   |         |            |              |            |                                   |              |            |              | 699.31     | 1396.61  | 1396.74                     | -0.13         | 0        | 89      | 2.1e-008 | K.VIYSTNNAFAAVK.E  |               |         |         |
|         |                                   |         |            |              |            |                                   |              |            |              | 714.78     | 1427.55  | 1427.69                     | -0.14         | 0        | 75      | 4.9e-007 | R.GVDQFTYTLVSDGK.G |               |         |         |
|         |                                   |         |            |              |            |                                   |              |            |              | 720.27     | 1438.53  | 1438.72                     | -0.19         | 0        | 70      | 1.5e-006 | K.QGATGITYTPGAFR.G |               |         |         |
|         |                                   |         |            |              |            |                                   |              |            |              | 721.77     | 1441.53  | 1441.71                     | -0.18         | 0        | 78      | 2.8e-007 | R.GVDQFTYVITDVGK.D |               |         |         |
|         |                                   |         |            |              |            |                                   |              |            |              | 722.84     | 1443.66  | 1443.80                     | -0.13         | 0        | 66      | 4.4e-006 | K.LAPNLFLETISN.-   |               |         |         |
|         |                                   |         |            |              |            |                                   |              |            |              | 735.24     | 1468.46  | 1468.66                     | -0.20         | 0        | 62      | 1.1e-005 | K.ENASVDYTPGNFR.G  |               |         |         |
|         |                                   |         |            |              | 861.17     | 1720.32                           | 1720.84      | -0.51      | 0            | 76         | 7.1e-007 | K.VETIFSDMYAFAALK.T         | Oxidation (M) |          |         |          |                    |               |         |         |
|         |                                   |         |            |              | 619.31     | 1854.90                           | 1855.93      | -1.03      | 0            | 45         | 0.00086  | K.ISVDVGDTLTSLTHGSAR.F      |               |          |         |          |                    |               |         |         |
|         |                                   |         |            |              | 738.63     | 2212.87                           | 2213.11      | -0.24      | 0            | 27         | 0.06     | R.LIADADGDALSIAHIYTANNR.A   |               |          |         |          |                    |               |         |         |
|         |                                   |         |            |              | 831.73     | 1661.44                           | 1661.81      | -0.37      | 0            | 26         | 0.039    | R.ALEFLPSEELTER.L           |               |          |         |          |                    |               |         |         |
|         |                                   |         |            |              | 806.27     | 2415.79                           | 2414.32      | 1.47       | 0            | 65         | 3.8e-006 | R.ALLDITDNILNGEIVHPVDVVR.H  |               |          |         |          |                    |               |         |         |
|         |                                   |         |            |              | A2         |                                   | Gene         | Annotation | Mascot Score | Mass (kDa) | Coverage | Observed m/z                | Mr(expt)      | Mr(calc) | Delta   | Miss     | Score              | Expect        | Peptide | Var_Mod |
|         |                                   |         |            |              |            |                                   |              |            |              |            |          |                             |               |          |         |          |                    |               |         |         |
|         |                                   |         |            |              | SO0432     | aconitate hydratase 2, AcnB       | 1250         | 94         | 36.0         | 391.40     | 780.78   | 780.52                      | 0.26          | 0        | 31      | 0.011    | R.IPLIIGR.G        |               |         |         |

|        |                                         |      |     |      |         |         |         |       |    |        |          |                                      |               |
|--------|-----------------------------------------|------|-----|------|---------|---------|---------|-------|----|--------|----------|--------------------------------------|---------------|
|        |                                         |      |     |      | 530.33  | 1058.64 | 1058.56 | 0.08  | 0  | 75     | 5.3e-007 | K.TDVLLEDEVRA                        |               |
|        |                                         |      |     |      | 602.35  | 1202.69 | 1202.66 | 0.03  | 0  | 61     | 1.5e-005 | K.AIELGMLTVEK.K                      |               |
|        |                                         |      |     |      | 607.35  | 1212.68 | 1212.52 | 0.16  | 0  | 25     | 0.053    | K.WMIAEYGGDRR                        | Oxidation (M) |
|        |                                         |      |     |      | 613.28  | 1224.55 | 1224.56 | -0.01 | 0  | 44     | 0.00065  | K.ELDATAADTYR.Y                      |               |
|        |                                         |      |     |      | 615.33  | 1228.64 | 1228.69 | -0.05 | 0  | 73     | 7.9e-007 | R.VLEIEGLESLK.V                      |               |
|        |                                         |      |     |      | 629.84  | 1257.66 | 1257.66 | -0.00 | 0  | 45     | 0.0007   | R.IPPGVDEAAYVKA                      |               |
|        |                                         |      |     |      | 724.27  | 1446.52 | 1446.70 | -0.18 | 0  | 58     | 3.2e-005 | R.HGSDEVISEFLK.T                     |               |
|        |                                         |      |     |      | 727.27  | 1452.53 | 1452.75 | -0.22 | 0  | 78     | 2.6e-007 | R.DGIEPDVAGSVGPIK.K                  |               |
|        |                                         |      |     |      | 735.27  | 1468.52 | 1468.71 | -0.19 | 0  | 67     | 3.7e-006 | R.LPTVEEYQEYAKE                      |               |
|        |                                         |      |     |      | 753.75  | 1505.48 | 1505.70 | -0.22 | 0  | 72     | 7.4e-007 | R.YLNFQDYSYTK.K                      |               |
|        |                                         |      |     |      | 776.21  | 1550.41 | 1550.72 | -0.31 | 0  | 113    | 9.8e-011 | K.VEQAFELSDASAERS                    |               |
|        |                                         |      |     |      | 552.80  | 1655.39 | 1655.79 | -0.40 | 0  | 40     | 0.0016   | R.MLLPDTVGTGGDSHTR.F                 |               |
|        |                                         |      |     |      | 855.24  | 1708.46 | 1708.88 | -0.42 | 0  | 119    | 1.9e-011 | K.GFPLVYVGDVVGTSRR.K                 |               |
|        |                                         |      |     |      | 950.16  | 1898.32 | 1898.92 | -0.60 | 0  | 48     | 0.00022  | K.MEMGDVIDIYPYAGVVK.R                |               |
|        |                                         |      |     |      | 674.63  | 2020.86 | 2020.92 | -0.06 | 1  | 73     | 1.8e-006 | K.MDKDQLTEEGYGFGR.V                  |               |
|        |                                         |      |     |      | 691.05  | 2070.14 | 2070.15 | -0.01 | 0  | 55     | 8.8e-005 | R.AAEGVVPKPLDAHQVAELVK.L             |               |
|        |                                         |      |     |      | 696.92  | 2087.73 | 2088.03 | -0.30 | 0  | 26     | 0.078    | K.ALAHTLLMFDSEFHDVVEK.M              | Oxidation (M) |
|        |                                         |      |     |      | 766.28  | 2295.83 | 2295.22 | 0.60  | 0  | 43     | 0.00056  | R.AVLGLPASEVFRPQDIADNGK.G            |               |
|        |                                         |      |     |      | 836.22  | 2505.62 | 2506.27 | -0.64 | 0  | 55     | 8.6e-005 | K.IAPIFNTMEDAGALPIELDVSK.M           | Oxidation (M) |
|        |                                         |      |     |      | 833.98  | 3331.90 | 3332.63 | -0.73 | 0  | 26     | 0.014    | K.VSGETNTDDELSPAPDAWSRPDIPLHALAMLK.N | Oxidation (M) |
| S02427 | TonB-dependent receptor                 | 1122 | 92  | 30   | 905.59  | 905.50  | 0.10    | 0     | 57 | 4e-005 | 1        |                                      |               |
|        |                                         |      |     |      | 577.37  | 1152.72 | 1152.60 | 0.12  | 0  | 46     | 0.0004   | K.VSNDTTYLIK.F                       |               |
|        |                                         |      |     |      | 656.28  | 1310.55 | 1310.59 | -0.04 | 0  | 69     | 2.3e-006 | R.IYNQD'TD'TWRL                      |               |
|        |                                         |      |     |      | 698.84  | 1395.66 | 1395.75 | -0.09 | 0  | 61     | 1.2e-005 | R.SNQLAAQPAQIK.L                     |               |
|        |                                         |      |     |      | 791.76  | 1581.50 | 1581.81 | -0.31 | 0  | 92     | 8.8e-009 | K.IGLTYTATDELMVR.T                   |               |
|        |                                         |      |     |      | 930.20  | 1858.38 | 1858.93 | -0.56 | 0  | 127    | 3.6e-012 | R.QDMETASPVTVIDAAAIA.K               |               |
|        |                                         |      |     |      | 673.98  | 2018.93 | 2020.05 | -1.12 | 0  | 99     | 1.9e-009 | K.DGASAVYGSDAIAGVVNIITK.K            |               |
|        |                                         |      |     |      | 1107.54 | 2213.07 | 2213.94 | -0.87 | 0  | 37     | 0.0023   | R.TETYDYSNDVYFQTPSER.R               |               |
|        |                                         |      |     |      | 1154.50 | 2306.99 | 2308.00 | -1.01 | 0  | 74     | 4.7e-007 | R.SMTDVYTDYDANDNPFVAVR.G             | Oxidation (M) |
|        |                                         |      |     |      | 770.20  | 2307.57 | 2307.97 | -0.40 | 0  | 84     | 5.4e-008 | K.FEQDGENYGTIDGNMGAYAR.V             |               |
|        |                                         |      |     |      | 790.85  | 2369.53 | 2370.04 | -0.51 | 1  | 75     | 4.2e-007 | K.RTETYDYSNDVYFQTPSER.R              |               |
|        |                                         |      |     |      | 797.91  | 2390.71 | 2390.16 | 0.56  | 0  | 85     | 3.8e-008 | R.MVNSGSGADSVDLNSIPVAMIAR.V          | Oxidation (M) |
|        |                                         |      |     |      | 924.57  | 2770.69 | 2771.34 | -0.66 | 0  | 67     | 4.3e-006 | R.SLFANMTQELGNDVVLTAADIYTNRR         | Oxidation (M) |
|        |                                         |      |     |      | 1003.79 | 3008.36 | 3008.47 | -0.12 | 0  | 68     | 1.2e-006 | K.NLTDEKPLYVTNGSDAGTVPQVYD'TVGR.T    |               |
|        |                                         |      |     |      | 1034.77 | 3101.29 | 3102.53 | -1.23 | 1  | 50     | 6.8e-005 | R.GVIQGRDWDYDPLDNTSSIIPTGLNQLK.V     |               |
| S00424 | pyruvate dehydrogenase, E1 component, A | 543  | 100 | 17.0 | 517.33  | 1032.65 | 1032.54 | 0.11  | 0  | 41     | 0.0016   | R.YWDPLLAR.D                         |               |
|        |                                         |      |     |      | 529.35  | 1056.68 | 1056.51 | 0.17  | 0  | 23     | 0.087    | R.TFGMEGLFR.Q                        |               |
|        |                                         |      |     |      | 570.82  | 1139.62 | 1139.56 | 0.06  | 0  | 41     | 0.0014   | R.EISSTMAFVR.V                       |               |
|        |                                         |      |     |      | 596.81  | 1191.60 | 1191.59 | 0.01  | 0  | 69     | 2.6e-006 | R.LSESQLANFR.Q                       |               |
|        |                                         |      |     |      | 617.35  | 1232.69 | 1232.64 | 0.05  | 0  | 49     | 0.00032  | K.IIQELEGEFR.G                       |               |
|        |                                         |      |     |      | 618.33  | 1234.65 | 1235.69 | -1.04 | 0  | 22     | 0.11     | K.NIVPIIPDEAR.T                      |               |
|        |                                         |      |     |      | 639.33  | 1276.65 | 1276.66 | -0.01 | 0  | 43     | 0.0011   | K.FSEELVPSLKI                        |               |
|        |                                         |      |     |      | 641.38  | 1280.75 | 1280.73 | 0.02  | 0  | 42     | 0.00091  | K.ELPVDVLANAIE                       |               |
|        |                                         |      |     |      | 647.29  | 1292.56 | 1292.56 | -0.00 | 0  | 52     | 0.00012  | R.IGDMAWAAGDMR.A                     |               |
|        |                                         |      |     |      | 653.79  | 1305.57 | 1305.67 | -0.10 | 0  | 37     | 0.003    | K.IFDSILQGSNGR.E                     |               |
|        |                                         |      |     |      | 798.67  | 1595.34 | 1595.75 | -0.41 | 1  | 38     | 0.0029   | K.EYGIDADKINPQYA.-                   |               |
|        |                                         |      |     |      | 801.70  | 1601.38 | 1602.73 | -1.35 | 0  | 51     | 0.00016  | K.YVPQDSQVAYYR.E                     |               |
|        |                                         |      |     |      | 1004.15 | 3009.43 | 3010.42 | -0.99 | 0  | 37     | 0.004    | R.FNPIPPDQLEDLPHYHGPDSSEVK.Y         |               |
| S01429 | anaerobic dimethyl sulfoxide reductase  | 474  | 92  | 19.0 | 601.30  | 1200.60 | 1200.66 | -0.07 | 0  | 48     | 0.00029  | K.APPIV'TGAGVNR.H                    |               |
|        |                                         |      |     |      | 617.28  | 1232.55 | 1233.62 | -1.07 | 0  | 58     | 4.9e-005 | K.LVAEFTASGDPKK                      |               |
|        |                                         |      |     |      | 634.86  | 1267.71 | 1267.65 | 0.07  | 0  | 31     | 0.012    | K.VEIVSLSMAQK.G                      |               |
|        |                                         |      |     |      | 644.26  | 1286.51 | 1286.58 | -0.07 | 0  | 38     | 0.0042   | R.QSGSGEGYDFLKA                      |               |
|        |                                         |      |     |      | 693.79  | 1385.57 | 1385.70 | -0.14 | 0  | 58     | 2.3e-005 | R.GTADLDTPLGADIKA                    |               |
|        |                                         |      |     |      | 724.31  | 1446.61 | 1446.77 | -0.16 | 0  | 46     | 0.00055  | K.TPVLALDSYINGGKA                    |               |
|        |                                         |      |     |      | 843.21  | 1684.41 | 1684.81 | -0.40 | 0  | 62     | 1.1e-005 | K.ESISFFTWAEAIER.G                   |               |
|        |                                         |      |     |      | 894.66  | 1787.30 | 1787.84 | -0.54 | 0  | 23     | 0.082    | K.TQYLPYIDVEDNYR.N                   |               |
|        |                                         |      |     |      | 689.68  | 2066.01 | 2067.09 | -1.08 | 0  | 80     | 1.1e-007 | R.VAPGVVALGQAWYQPDIAI                |               |
|        |                                         |      |     |      | 1060.14 | 2118.26 | 2119.06 | -0.80 | 0  | 77     | 2.6e-007 | K.FVPISWDEASTIASIQR.I                |               |
|        |                                         |      |     |      | 801.22  | 2400.63 | 2401.10 | -0.47 | 1  | 42     | 0.0019   | K.EAEYTEGKDEAAWLEELYQK.T             |               |

|        |                                            |     |     |      |         |         |         |       |   |    |          |                              |               |
|--------|--------------------------------------------|-----|-----|------|---------|---------|---------|-------|---|----|----------|------------------------------|---------------|
| S02907 | TonB-dependent receptor domain protein     | 396 | 96  | 14.0 | 542.82  | 1083.62 | 1083.52 | 0.09  | 0 | 46 | 0.00043  | K.TFDGLAFDAKF                |               |
|        |                                            |     |     |      | 603.36  | 1204.70 | 1204.65 | 0.05  | 0 | 65 | 7.5e-006 | R.YEALDNLVLR.A               |               |
|        |                                            |     |     |      | 610.31  | 1218.61 | 1218.53 | 0.07  | 0 | 43 | 0.001    | K.DSVFSNMTYR.I               |               |
|        |                                            |     |     |      | 904.62  | 1807.22 | 1806.90 | 0.32  | 0 | 45 | 0.00048  | R.ITDELEWFGQAVMR.D           |               |
|        |                                            |     |     |      | 636.39  | 1906.15 | 1906.06 | 0.09  | 0 | 55 | 0.00011  | K.AAFVELELPVLDHLNVKL         |               |
|        |                                            |     |     |      | 995.14  | 1988.27 | 1989.00 | -0.73 | 0 | 61 | 1.1e-005 | R.TDMESALPVTVLSAEDIAKT       |               |
|        |                                            |     |     |      | 1086.04 | 2170.06 | 2170.97 | -0.90 | 0 | 44 | 0.00047  | K.YIDSYDGETPQQQEVGTNK.Q      |               |
|        |                                            |     |     |      | 829.28  | 2484.81 | 2486.25 | -1.44 | 0 | 39 | 0.0017   | R.IAPSATFGGDATNLNLPMDAIER.I  |               |
|        |                                            |     |     |      | 600.84  | 1199.66 | 1199.69 | -0.03 | 1 | 35 | 0.0061   | K.RQELIDVLVSK.M              |               |
|        |                                            |     |     |      | 625.30  | 1248.58 | 1248.64 | -0.06 | 0 | 48 | 0.00025  | K.ITGDGITNALMK.T             | Oxidation (M) |
| S01521 | respiratory FAD-dependent D-lactate dehy   | 394 | 103 | 8.0  | 675.78  | 1349.55 | 1349.60 | -0.05 | 0 | 60 | 3e-005   | R.FAWSTDASYFR.I              |               |
|        |                                            |     |     |      | 684.85  | 1367.69 | 1367.80 | -0.11 | 0 | 73 | 6.6e-007 | R.TLPEVVVTLRER.A             |               |
|        |                                            |     |     |      | 695.79  | 1389.56 | 1390.66 | -1.10 | 0 | 26 | 0.053    | K.EVPYWNPDFPK.G              |               |
|        |                                            |     |     |      | 877.97  | 2630.90 | 2631.37 | -0.47 | 0 | 91 | 2.1e-008 | K.QVFDPPQGLNPGVILNDDSNIHVK.N |               |
|        |                                            |     |     |      | 607.84  | 1213.67 | 1213.67 | 0.00  | 0 | 50 | 0.00021  | R.QGDDVVVELTR.R              |               |
|        |                                            |     |     |      | 693.31  | 1384.61 | 1384.72 | -0.11 | 0 | 90 | 1.5e-008 | R.SLPLVTIDGEDAR.D            |               |
|        |                                            |     |     |      | 694.31  | 1386.60 | 1386.74 | -0.14 | 0 | 50 | 0.00017  | R.ITQEILIASEDR.N             |               |
|        |                                            |     |     |      | 746.34  | 1490.66 | 1489.73 | 0.93  | 0 | 37 | 0.005    | K.QMAPGMEIEIALR.N            |               |
|        |                                            |     |     |      | 953.22  | 1904.42 | 1904.97 | -0.55 | 0 | 30 | 0.027    | R.GNSVYFSPQVIPMLPEK.I        |               |
|        |                                            |     |     |      | 754.58  | 2260.71 | 2262.02 | -1.31 | 0 | 35 | 0.0036   | K.EGYGFFKPDGEGDDLFIISNR.D    |               |
| S00781 | glycine dehydrogenase (decarboxylating), ( | 216 | 105 | 4.0  | 609.37  | 1216.73 | 1216.68 | 0.05  | 0 | 69 | 2.2e-006 | R.FADILAAGLQAK.G             |               |
|        |                                            |     |     |      | 777.24  | 1552.47 | 1552.79 | -0.32 | 0 | 69 | 1.8e-006 | K.STQTALLNANYVMK.K           |               |
|        |                                            |     |     |      | 886.67  | 1771.32 | 1771.88 | -0.56 | 0 | 43 | 0.0013   | R.FGQITDFTDLFAELR.A          |               |
| S03193 | polysaccharide biosynthesis/export protei  | 214 | 100 | 4.0  | 585.32  | 1168.62 | 1168.68 | -0.06 | 0 | 36 | 0.0073   | K.VNDLIVAAGGLK.E             |               |
|        |                                            |     |     |      | 746.81  | 1491.61 | 1491.76 | -0.16 | 0 | 71 | 1.2e-006 | K.MLANLFDAAELK.L             |               |
| S04692 | acridine efflux pump, AcrB/AcrD/AcrF fam   | 209 | 112 | 6.0  | 765.00  | 2291.98 | 2292.13 | -0.15 | 0 | 42 | 0.0016   | K.DGTVVNYADAQLMLADLENIK.A    |               |
|        |                                            |     |     |      | 754.71  | 1507.41 | 1507.73 | -0.32 | 0 | 70 | 1.5e-006 | K.SDTSGANVFLGDVAR.V          |               |
|        |                                            |     |     |      | 758.26  | 1514.52 | 1514.79 | -0.28 | 0 | 48 | 0.00026  | K.IVEDSVTVQVIEQRM            |               |
|        |                                            |     |     |      | 759.27  | 1516.52 | 1517.74 | -1.22 | 0 | 36 | 0.0048   | R.VMSEGLSPLAETRK             |               |
| S02606 | PqiB family protein                        | 114 | 93  | 2.0  | 752.24  | 2253.69 | 2254.16 | -0.47 | 0 | 31 | 0.025    | K.LQGAMTLQPQVQAGQGVVVK.S     | Oxidation (M) |
|        |                                            |     |     |      | 616.74  | 1231.47 | 1232.68 | -1.21 | 0 | 38 | 0.0053   | K.ETLFWLVTPK.A               |               |
|        |                                            |     |     |      | 804.18  | 1606.35 | 1607.80 | -1.45 | 0 | 49 | 0.00041  | K.LVESSYANVAEDALK.F          |               |
| S01482 | TonB-dependent receptor                    | 106 | 90  | 4.0  | 816.23  | 1630.44 | 1630.81 | -0.37 | 0 | 52 | 0.00018  | K.AFDDQMLASLVFFK.S           |               |
|        |                                            |     |     |      | 834.73  | 1667.45 | 1667.84 | -0.39 | 0 | 30 | 0.03     | R.LEQFSIYDADQVIK.D           |               |
|        |                                            |     |     |      | 658.81  | 1315.61 | 1316.72 | -1.11 | 0 | 49 | 0.00045  | R.SLTNVESVEVLK.G             |               |
| S01637 | outer membrane protein assembly factor, Y  | 96  | 92  | 6.0  | 626.44  | 1250.87 | 1250.80 | 0.07  | 0 | 64 | 7.7e-006 | R.VALGAALLSLPVK.V            |               |
|        |                                            |     |     |      | 778.72  | 1555.43 | 1555.71 | -0.28 | 0 | 39 | 0.0034   | K.DYVAWWDLFGFR.R             |               |
|        |                                            |     |     |      | 833.17  | 1664.32 | 1664.75 | -0.43 | 0 | 32 | 0.012    | K.TDFDTNYYFPINR.S            |               |
|        |                                            |     |     |      | 583.61  | 1747.82 | 1747.91 | -0.09 | 0 | 22 | 0.084    | K.VTERPTISAVTPEGNK.D         |               |
| S03560 | subfamily M16B unassigned peptidases       | 64  | 105 | 2.0  | 659.82  | 1317.63 | 1318.69 | -1.06 | 0 | 31 | 0.016    | R.LLASINEFEQR.G              |               |
|        |                                            |     |     |      | 763.25  | 1524.49 | 1525.72 | -1.23 | 0 | 26 | 0.045    | K.LFEPAFNEADFAR.V            |               |

### A3

| Gene   | Annotation                                  | Mascot Score | Mass (kDa) | Coverage | Observed m/z | Mr(expt) | Mr(calc) | Delta | Miss | Score | Expect   | Peptide                | Var_Mod       |
|--------|---------------------------------------------|--------------|------------|----------|--------------|----------|----------|-------|------|-------|----------|------------------------|---------------|
| S00021 | fatty oxidation complex, alpha subunit, Fad | 1050         | 77         | 38.0     | 478.89       | 955.77   | 955.55   | 0.21  | 0    | 34    | 0.0085   | K.MPLVEVIR.G           |               |
|        |                                             |              |            |          | 560.84       | 1119.66  | 1119.56  | 0.11  | 0    | 34    | 0.0061   | K.AFDADEIAR.T          |               |
|        |                                             |              |            |          | 582.32       | 1162.62  | 1163.52  | -0.90 | 0    | 51    | 0.00012  | K.GFYAYSVDSR.G         |               |
|        |                                             |              |            |          | 622.27       | 1242.53  | 1241.57  | 0.96  | 0    | 36    | 0.004    | R.ALAANNGSYQA-         |               |
|        |                                             |              |            |          | 668.31       | 1334.61  | 1334.69  | -0.09 | 0    | 40    | 0.0014   | R.TMIPMIIETVR.C        | Oxidation (M) |
|        |                                             |              |            |          | 701.32       | 1400.62  | 1400.76  | -0.14 | 0    | 36    | 0.0068   | K.LEDLPPPTASAIK.G      |               |
|        |                                             |              |            |          | 723.81       | 1445.61  | 1445.76  | -0.15 | 0    | 87    | 3.8e-008 | R.ETLASLDAALDSIK.Q     |               |
|        |                                             |              |            |          | 739.33       | 1476.64  | 1476.83  | -0.19 | 0    | 27    | 0.031    | K.ALIGIFLNDQFVK.G      |               |
|        |                                             |              |            |          | 743.82       | 1485.62  | 1485.82  | -0.19 | 0    | 63    | 1.2e-005 | K.QQSNIQALVLTSGK.D     |               |
|        |                                             |              |            |          | 750.26       | 1498.51  | 1498.78  | -0.27 | 0    | 47    | 0.00029  | R.SDALQIEHQAFIKL       |               |
|        |                                             |              |            |          | 819.73       | 1637.45  | 1637.86  | -0.41 | 0    | 51    | 0.00012  | K.DIAQPALDLGLNEAAK.L   |               |
|        |                                             |              |            |          | 821.27       | 1640.52  | 1640.91  | -0.39 | 0    | 61    | 1.2e-005 | K.VLNNITPALEYAPVK.H    |               |
|        |                                             |              |            |          | 864.22       | 1726.43  | 1726.86  | -0.43 | 0    | 111   | 1.4e-010 | R.YLDTMGVANFVALADK.Y   |               |
|        |                                             |              |            |          | 867.69       | 1733.37  | 1733.86  | -0.48 | 0    | 64    | 8.4e-006 | K.TPIVNDPCGFFVNR.V     |               |
|        |                                             |              |            |          | 622.63       | 1864.87  | 1863.88  | 0.98  | 0    | 66    | 3.9e-006 | R.GEHSSEETIASVVAYASK.M |               |
|        |                                             |              |            |          | 637.98       | 1910.93  | 1911.95  | -1.02 | 0    | 73    | 5.8e-007 | K.HYPAPMAAVNVVEQAATK.G | Oxidation (M) |



|         |                                         |         |       |      |         |                                           |         |       |      |        |          |                               |               |
|---------|-----------------------------------------|---------|-------|------|---------|-------------------------------------------|---------|-------|------|--------|----------|-------------------------------|---------------|
| S00842  | translation elongation factor G, FusA_2 | 368     | 77    | 19.0 | 608.83  | 1215.65                                   | 1215.63 | 0.01  | 0    | 36     | 0.0044   | R.EVDNLLGSLEK.K               | Oxidation (M) |
|         |                                         |         |       |      | 698.81  | 1395.61                                   | 1395.74 | -0.13 | 0    | 74     | 1.2e-006 | K.EALLAANPDVDL.R.E            |               |
|         |                                         |         |       |      | 750.77  | 1499.52                                   | 1499.73 | -0.21 | 0    | 33     | 0.0071   | R.DFFPLTVNYQEK.T              |               |
|         |                                         |         |       |      | 804.71  | 1607.41                                   | 1607.80 | -0.39 | 0    | 35     | 0.0056   | K.EIMEIALQQAYGAR.V            |               |
|         |                                         |         |       |      | 833.73  | 1665.45                                   | 1664.88 | 0.57  | 0    | 77     | 3.5e-007 | R.VGYINGEYVNLNPTVK.Q          |               |
|         |                                         |         |       |      | 933.64  | 1865.28                                   | 1865.90 | -0.62 | 0    | 39     | 0.0019   | R.GINAVMPSAEFFPVS.V           |               |
|         |                                         |         |       |      | 875.52  | 2623.54                                   | 2624.31 | -0.77 | 0    | 53     | 4.8e-005 | K.AEAGKPTWDWTAPVEDEALVAQIK.E  |               |
|         |                                         |         |       |      | 899.48  | 2695.41                                   | 2696.18 | -0.77 | 0    | 73     | 5.1e-007 | K.EGDDFVLSDDLGEDHLGDMDFK.V    |               |
|         |                                         |         |       |      | 455.33  | 908.66                                    | 909.51  | -0.85 | 0    | 56     | 4.9e-005 | R.FGALTFRV.R                  |               |
|         |                                         |         |       |      | 825.18  | 1648.35                                   | 1648.78 | -0.43 | 0    | 75     | 5.5e-007 | K.DVPANMVDLVEEYR.E            |               |
|         |                                         |         |       |      | 877.71  | 1753.40                                   | 1753.87 | -0.48 | 0    | 74     | 1e-006   | K.ADVPLSEMFYIGSLR.T           |               |
|         |                                         |         |       |      | 897.21  | 1792.40                                   | 1792.94 | -0.53 | 0    | 38     | 0.0024   | R.TYGVELIVGEPQVAYR.E          |               |
|         |                                         |         |       |      | 934.64  | 1867.27                                   | 1867.86 | -0.59 | 0    | 36     | 0.0062   | K.AYVWDDSGIPENFEVK.D          |               |
|         |                                         |         |       |      | 1023.12 | 2044.23                                   | 2044.97 | -0.74 | 0    | 65     | 4.3e-006 | K.VDFVSPDDNVGDVIGDLNR.R       |               |
|         |                                         |         |       |      | S02492  | oxidoreductase, acyl-CoA dehydrogenase fa | 317     | 83    | 11.0 | 750.54 | 2248.61  | 2248.99                       |               |
| 845.54  | 2533.60                                 | 2534.19 | -0.59 | 0    |         |                                           |         |       |      | 25     | 0.068    | K.VLDGGIAVFCGSGVPEPQSETNWR.Y  |               |
| 567.88  | 1133.75                                 | 1133.65 | 0.11  | 0    |         |                                           |         |       |      | 62     | 1.1e-005 | K.EGFFALIHPK.K                |               |
| 645.29  | 1288.56                                 | 1288.67 | -0.11 | 0    |         |                                           |         |       |      | 48     | 0.00024  | R.LAAINVNDFEAL.-              |               |
| 646.29  | 1290.56                                 | 1290.65 | -0.09 | 0    |         |                                           |         |       |      | 55     | 5.3e-005 | R.GEPNGEEVLGLK.L              |               |
| 681.82  | 1361.63                                 | 1361.73 | -0.10 | 0    |         |                                           |         |       |      | 54     | 6.1e-005 | R.IIANTYQLEAAR.R              |               |
| 711.77  | 1421.53                                 | 1421.69 | -0.16 | 0    |         |                                           |         |       |      | 30     | 0.019    | K.DLPELWDYFK.K                |               |
| 856.23  | 1710.45                                 | 1710.89 | -0.43 | 0    |         |                                           |         |       |      | 44     | 0.00066  | R.MGDVLSQLYLGSA TLK.L         |               |
| 574.01  | 1719.00                                 | 1718.87 | 0.13  | 0    |         |                                           |         |       |      | 24     | 0.047    | K.MATELVSGMLKPSPAR.E          |               |
| 617.34  | 1232.67                                 | 1232.65 | 0.02  | 0    |         |                                           |         |       |      | 49     | 0.0002   | R.VYQTVNSPLGR.V               |               |
| 744.79  | 1487.57                                 | 1487.80 | -0.23 | 0    |         |                                           |         |       |      | 51     | 0.00012  | R.TGDVLPGTIPVYR.E             |               |
| 811.21  | 1620.40                                 | 1620.78 | -0.38 | 0    |         |                                           |         |       |      | 68     | 3e-006   | R.GMVDLSSGLTDSGNIR.G          |               |
| 902.16  | 1802.30                                 | 1802.85 | -0.55 | 0    |         |                                           |         |       |      | 60     | 1.9e-005 | R.FNYGDNLIDTAIYER.V           |               |
| 1021.13 | 2040.24                                 | 2041.04 | -0.80 | 0    |         |                                           |         |       |      | 35     | 0.0038   | R.GIAVTSILYDGVPTTYDTR.F       |               |
| 805.92  | 2414.73                                 | 2415.15 | -0.42 | 0    |         |                                           |         |       |      | 37     | 0.0065   | R.QEFANPYYYPTAAVPLGDFR.D      |               |
| S04523  | TonB-dependent adherence-conferring pro | 215     | 73    | 9.0  | 616.84  | 1231.66                                   | 1231.59 | 0.07  | 0    | 27     | 0.072    | K.FSAGIYNADF.K.E              | Oxidation (M) |
|         |                                         |         |       |      | 666.78  | 1331.54                                   | 1331.60 | -0.06 | 0    | 23     | 0.084    | R.WDFGTSDTYIK.H               |               |
|         |                                         |         |       |      | 717.30  | 1432.59                                   | 1432.77 | -0.17 | 0    | 62     | 9.3e-006 | R.IVVTASGFEQQR.D              |               |
|         |                                         |         |       |      | 749.23  | 1496.45                                   | 1496.75 | -0.30 | 0    | 51     | 0.00026  | R.GMGSQYTLILVDGK.R            |               |
|         |                                         |         |       |      | 548.57  | 1642.70                                   | 1642.72 | -0.02 | 0    | 56     | 8.2e-005 | R.LDDDENFNGEHLSPRI            |               |
|         |                                         |         |       |      | 638.29  | 1274.56                                   | 1274.65 | -0.09 | 0    | 50     | 0.00021  | K.FGVEEIEPLSR.I               |               |
|         |                                         |         |       |      | 733.28  | 1464.55                                   | 1464.72 | -0.17 | 0    | 76     | 3.7e-007 | R.EFGVDLTQVTGSGR.K            |               |
|         |                                         |         |       |      | 808.88  | 2423.62                                   | 2424.22 | -0.60 | 0    | 55     | 3.7e-005 | K.TLQQFPVFNSSSLSDGESLIQK.K    |               |
|         |                                         |         |       |      | 653.30  | 1304.59                                   | 1304.67 | -0.09 | 0    | 43     | 0.00075  | K.SGVLTLGLPDAYGR.G            |               |
|         |                                         |         |       |      | 672.32  | 1342.62                                   | 1342.68 | -0.06 | 0    | 75     | 4.8e-007 | R.TSSFLDIYIER.D               |               |
|         |                                         |         |       |      | 589.95  | 1766.84                                   | 1767.97 | -1.14 | 1    | 21     | 0.1      | K.DLETIVGLQTDAPLKR.A          |               |
|         |                                         |         |       |      | 749.59  | 2245.75                                   | 2246.13 | -0.38 | 1    | 72     | 1.8e-006 | R.EMLEDAVVNPDKYPLTIR.V        |               |
|         |                                         |         |       |      | 775.77  | 1549.52                                   | 1549.85 | -0.33 | 0    | 48     | 0.00026  | K.IATDPFVGTTLTFR.V            |               |
|         |                                         |         |       |      | 872.68  | 1743.34                                   | 1743.87 | -0.53 | 0    | 54     | 0.00011  | R.VYSGVLESVGSVYNSVK.Q         |               |
|         |                                         |         |       |      | 810.63  | 2428.86                                   | 2429.22 | -0.36 | 0    | 52     | 0.00017  | K.LEPNEGAGYEFINAIVGGVVPRE     |               |
| S01894  | methylcrotonyl-CoA carboxylase, MccA    | 119     | 76    | 10.0 | 791.22  | 1580.42                                   | 1580.80 | -0.39 | 0    | 29     | 0.018    | K.VVEEAPAPGLSDEL.R.A          | Oxidation (M) |
|         |                                         |         |       |      | 578.68  | 1733.03                                   | 1732.94 | 0.09  | 0    | 34     | 0.015    | K.AGELVSDGAVLLHVEPK.A         |               |
|         |                                         |         |       |      | 680.31  | 2037.90                                   | 2038.04 | -0.14 | 0    | 21     | 0.088    | R.LQVEHPVTEMVTGQDLVK.W        |               |
|         |                                         |         |       |      | 754.93  | 2261.76                                   | 2262.08 | -0.32 | 0    | 40     | 0.0012   | K.AQAQAIHPGYFLSENADFAR.K      |               |
|         |                                         |         |       |      | 552.33  | 1102.65                                   | 1101.55 | 1.11  | 0    | 26     | 0.076    | K.AGIDAGGWLDK.Q               |               |
|         |                                         |         |       |      | 852.70  | 1703.38                                   | 1703.83 | -0.45 | 0    | 26     | 0.045    | R.LDSAPSLIEGSEDPFK.D          |               |
|         |                                         |         |       |      | 989.43  | 2965.27                                   | 2966.48 | -1.20 | 0    | 30     | 0.011    | R.VIPGQPIIQQDLDYHQQLSNPSEYK.Y |               |

| A4     |                     | Mascot Score | Mass (kDa) | Coverage | Observed m/z | Mr(expt) | Mr(calc) | Delta | Miss | Score | Expect   | Peptide                 | Var_Mod |
|--------|---------------------|--------------|------------|----------|--------------|----------|----------|-------|------|-------|----------|-------------------------|---------|
| S03545 | OmpA family protein | 1469         | 40         | 41.0     | 552.83       | 1103.65  | 1103.61  | 0.04  | 0    | 58    | 3.7e-005 | R.IEAIVTTTEK.Q          |         |
|        |                     |              |            |          | 630.85       | 1259.69  | 1259.71  | -0.02 | 1    | 73    | 1.3e-006 | R.RIEAIVTTEK.Q          |         |
|        |                     |              |            |          | 742.22       | 1482.43  | 1482.70  | -0.27 | 0    | 88    | 3.9e-008 | K.VDSVCGTLYENVK.K       |         |
|        |                     |              |            |          | 755.32       | 1508.62  | 1508.85  | -0.22 | 0    | 59    | 6e-005   | K.GATLGLVGVWPLGNR.W     |         |
|        |                     |              |            |          | 903.67       | 1805.33  | 1805.88  | -0.55 | 0    | 107   | 5.9e-010 | K.QEDVGSIQFANDSAVVK.K   |         |
|        |                     |              |            |          | 603.00       | 1805.97  | 1804.97  | 1.00  | 0    | 65    | 6.1e-006 | R.VTSNGYGTTPKPLVAGNSK.E |         |
|        |                     |              |            |          | 932.12       | 1862.23  | 1862.86  | -0.64 | 0    | 132   | 1.5e-012 | R.DLGSADWTTGGISNDAGVK.G |         |

|        |                                             |         |      |      |         |          |                 |       |   |    |          |                                     |  |               |
|--------|---------------------------------------------|---------|------|------|---------|----------|-----------------|-------|---|----|----------|-------------------------------------|--|---------------|
| S01821 | outer membrane porin                        | 467     | 44   | 31.0 | 645.46  | 1933.35  | 1933.97         | -0.62 | 1 | 94 | 9.1e-009 | K.KQEDVGSIQFANDSAVVK.K              |  |               |
|        |                                             |         |      |      | 688.32  | 2061.95  | 2062.07         | -0.12 | 2 | 57 | 4.1e-005 | K.KQEDVGSIQFANDSAVVKKE              |  |               |
|        |                                             |         |      |      | 737.34  | 2945.34  | 2944.41         | 0.93  | 0 | 24 | 0.097    | R.FGTPAAAAAPVAAAVVAAAPVDSNDGVYDDK.D |  |               |
|        |                                             |         |      |      | 1048.01 | 3140.99  | 3142.37         | -1.37 | 0 | 47 | 0.0009   | R.YENLDDTDFNTIEADSNYWGLELSYR.F      |  |               |
|        |                                             |         |      |      | 1100.34 | 3298.00  | 3298.47         | -0.46 | 1 | 30 | 0.022    | R.RYENLDDTDFNTIEADSNYWGLELSYR.F     |  |               |
|        |                                             |         |      |      | 618.71  | 1235.40  | 1236.58         | -1.18 | 0 | 61 | 4.2e-005 | R.ELSDGWNFAK.L                      |  |               |
|        |                                             |         |      |      | 640.83  | 1279.64  | 1279.67         | -0.03 | 0 | 86 | 4.8e-008 | K.EAVGAETLLSYK.F                    |  |               |
|        |                                             |         |      |      | 695.31  | 1388.60  | 1388.70         | -0.10 | 0 | 46 | 0.0011   | R.YFVSNILDAGK.D                     |  |               |
|        |                                             |         |      |      | 790.68  | 1579.35  | 1579.69         | -0.34 | 0 | 67 | 5.9e-006 | R.FESVQDEFFYNRL                     |  |               |
|        |                                             |         |      |      | 837.17  | 1672.33  | 1672.84         | -0.50 | 0 | 65 | 8.7e-006 | R.VINTQGETEVVNGASR.I                |  |               |
|        |                                             |         |      |      | 1005.25 | 2008.49  | 2008.03         | 0.46  | 0 | 33 | 0.026    | K.DYVIQPNLPIYANDVFK.R               |  |               |
|        |                                             |         |      |      | 1010.16 | 2018.30  | 2017.99         | 0.31  | 0 | 47 | 0.00047  | K.LEWGVNPGNSDIVSNR.F                |  |               |
|        |                                             |         |      |      | 953.53  | 2857.57  | 2858.33         | -0.76 | 1 | 39 | 0.0048   | R.KDFSDFTGVEAAMALSEDDGIAIGIR.Y      |  | Oxidation (M) |
|        |                                             |         |      |      | 637.31  | 1272.61  | 1272.67         | -0.06 | 0 | 65 | 9e-006   | R.LVDIEQVNSTRA                      |  |               |
| 638.30 | 1274.58                                     | 1273.70 | 0.88 | 0    | 61      | 3.7e-005 | R.LLVDAFSPVAR.I |       |   |    |          |                                     |  |               |
| S04693 | type I secretion membrane fusion protein, I | 134     | 40   | 24.0 | 863.26  | 1724.51  | 1724.96         | -0.45 | 0 | 83 | 1.5e-007 | K.EGVQEDILEILLNKK.G                 |  |               |
|        |                                             |         |      |      | 586.31  | 1170.60  | 1170.64         | -0.03 | 0 | 28 | 0.035    | K.AALVSANADLARA                     |  |               |
|        |                                             |         |      |      | 829.75  | 1657.48  | 1657.89         | -0.41 | 0 | 74 | 1.2e-006 | K.EALASVTVAEAAINTAK.I               |  |               |
|        |                                             |         |      |      | 837.71  | 1673.41  | 1673.90         | -0.49 | 0 | 40 | 0.0033   | K.INLEYTEVLAPISGR.I                 |  |               |
|        |                                             |         |      |      | 891.71  | 1781.41  | 1781.93         | -0.53 | 0 | 40 | 0.0053   | R.AMLNAGTDPQAILVPQKA                |  | Oxidation (M) |
| S03896 | outer membrane porin, putative              | 109     | 40   | 11.0 | 937.65  | 1873.29  | 1873.94         | -0.65 | 0 | 35 | 0.0072   | R.AEFPNPDGVLPLPGMYVRA               |  |               |
|        |                                             |         |      |      | 629.16  | 1884.45  | 1884.05         | 0.41  | 0 | 28 | 0.051    | K.AFLEAEVVRPQVNGHITK.R              |  |               |
|        |                                             |         |      |      | 636.17  | 1270.32  | 1271.58         | -1.26 | 0 | 46 | 0.0015   | R.SADGVWYYSPK.I                     |  |               |
|        |                                             |         |      |      | 835.27  | 1668.53  | 1668.82         | -0.29 | 0 | 42 | 0.0029   | K.TNESLYALSATLGDGSK.F               |  |               |
|        |                                             |         |      |      | 587.70  | 1760.09  | 1759.97         | 0.12  | 0 | 48 | 0.00073  | K.YTEVQHIDGKPTVVAKS                 |  |               |

#### A5

| Gene   | Annotation                            | Mascot Score | Mass (kDa) | Coverage | Observed m/z | Mr(expt) | Mr(calc)                | Delta | Miss | Score | Expect   | Peptide                      | Var_Mod |
|--------|---------------------------------------|--------------|------------|----------|--------------|----------|-------------------------|-------|------|-------|----------|------------------------------|---------|
| S03896 | Outer membrane porin, putative        | 7512         | 40         | 59.0     | 396.78       | 791.55   | 791.45                  | 0.09  | 0    | 24    | 0.093    | R.NTFLGLK.T                  |         |
|        |                                       |              |            |          | 468.32       | 934.63   | 934.49                  | 0.15  | 0    | 64    | 9.7e-006 | K.GIAGIDAYR.G                |         |
|        |                                       |              |            |          | 636.71       | 1271.40  | 1271.58                 | -0.18 | 0    | 89    | 3.1e-008 | R.SADGVWYYSPK.I              |         |
|        |                                       |              |            |          | 731.20       | 1460.39  | 1460.69                 | -0.31 | 0    | 104   | 1.2e-009 | K.DQNYLAVAYNK.G              |         |
|        |                                       |              |            |          | 743.19       | 1484.37  | 1484.64                 | -0.27 | 0    | 90    | 2.6e-008 | K.STMVGQYSMYR.G              |         |
|        |                                       |              |            |          | 781.72       | 1561.43  | 1561.77                 | -0.35 | 0    | 89    | 3e-008   | K.VDLQDDNVFVGVYR.Y           |         |
|        |                                       |              |            |          | 835.17       | 1668.33  | 1668.82                 | -0.49 | 0    | 112   | 1.8e-010 | K.TNESLYALSATLGDGSK.F        |         |
|        |                                       |              |            |          | 587.64       | 1759.91  | 1759.97                 | -0.06 | 0    | 66    | 1.4e-005 | K.YTEVQHIDGKPTVVAKS          |         |
|        |                                       |              |            |          | 967.57       | 1933.12  | 1933.88                 | -0.76 | 0    | 84    | 9e-008   | K.QAEGNVDFVGNNTADIDR.L       |         |
|        |                                       |              |            |          | 1022.58      | 2043.15  | 2043.95                 | -0.80 | 0    | 101   | 3.5e-009 | K.STTGTDISVQNFVNGADYR.F      |         |
|        |                                       |              |            |          | 708.55       | 2122.63  | 2122.92                 | -0.30 | 0    | 95    | 9.3e-009 | K.AEYGVDEAGFGNYNNVNVK.Y      |         |
|        |                                       |              |            |          | 771.90       | 2312.69  | 2313.14                 | -0.44 | 0    | 102   | 3.1e-009 | K.IADLVTLNATYLFDDNDTTAK.T    |         |
|        |                                       |              |            |          | 1216.01      | 2430.01  | 2431.13                 | -1.12 | 0    | 72    | 1.2e-006 | K.NYADENGGTYLENNFSLGK.G      |         |
|        |                                       |              |            |          | 811.94       | 2432.81  | 2433.22                 | -0.41 | 0    | 77    | 4.9e-007 | R.LELALNTTETGATLQSGTNGVDTK.N |         |
|        |                                       |              |            |          | 630.88       | 1259.75  | 1259.71                 | 0.04  | 1    | 45    | 0.0018   | R.RIEAVTTTEK.Q               |         |
|        |                                       |              |            |          | 742.22       | 1482.43  | 1482.70                 | -0.27 | 0    | 58    | 8.8e-005 | K.VDSVCGTLYENVK.K            |         |
|        |                                       |              |            |          | 903.66       | 1805.31  | 1805.88                 | -0.57 | 0    | 63    | 1.6e-005 | K.QEDVGSIQFANDSAVVK.K        |         |
|        |                                       |              |            |          | 603.00       | 1805.96  | 1804.97                 | 0.99  | 0    | 73    | 2.5e-006 | R.VTSNGYGITKPLVAGNSK.E       |         |
| 932.12 | 1862.23                               | 1862.86      | -0.63      | 0        | 129          | 3.2e-012 | R.DLGSADWTTGGISNDAGVK.G |       |      |       |          |                              |         |
| S02929 | expressed protein of unknown function | 76           | 41         | 6.0      | 645.63       | 1933.87  | 1933.97                 | -0.11 | 1    | 100   | 2e-009   | K.KQEDVGSIQFANDSAVVK.K       |         |
|        |                                       |              |            |          | 617.35       | 1232.68  | 1232.68                 | -0.00 | 0    | 40    | 0.0044   | R.IVFLATGDEIR.S              |         |
|        |                                       |              |            |          | 682.26       | 1362.51  | 1362.69                 | -0.18 | 0    | 65    | 1.6e-005 | R.VQEFLNELMPK.L              |         |

#### B1

| Gene   | Annotation          | Mascot Score | Mass (kDa) | Coverage | Observed m/z | Mr(expt) | Mr(calc) | Delta | Miss | Score | Expect   | Peptide           | Var_Mod |
|--------|---------------------|--------------|------------|----------|--------------|----------|----------|-------|------|-------|----------|-------------------|---------|
| S03935 | ribonuclease R, Rnr | 1135         | 91         | 27.0     | 607.77       | 1213.52  | 1213.67  | -0.14 | 0    | 75    | 6.3e-007 | R.QGDVVVVELTR.R   |         |
|        |                     |              |            |          | 643.75       | 1285.49  | 1285.67  | -0.18 | 0    | 85    | 6.1e-008 | K.MDLISGTVLGHKE   |         |
|        |                     |              |            |          | 670.23       | 1338.44  | 1338.62  | -0.18 | 0    | 39    | 0.0025   | R.QIDLMMGLDGSKG.G |         |
|        |                     |              |            |          | 693.22       | 1384.42  | 1384.72  | -0.30 | 0    | 81    | 1.2e-007 | R.SLPLVTIDGEDAR.D |         |
|        |                     |              |            |          | 694.21       | 1386.41  | 1386.74  | -0.32 | 0    | 60    | 1.6e-005 | R.ITQEILIASEDR.N  |         |
|        |                     |              |            |          | 707.18       | 1412.36  | 1412.65  | -0.29 | 0    | 80    | 1.8e-007 | R.LCMVAEMTISAR.G  |         |

|        |                                           |     |     |      |         |         |         |       |   |    |          |                                   |               |
|--------|-------------------------------------------|-----|-----|------|---------|---------|---------|-------|---|----|----------|-----------------------------------|---------------|
|        |                                           |     |     |      | 745.67  | 1489.32 | 1489.73 | -0.40 | 0 | 55 | 7e-005   | K.QMAPGMEIEIALR.N                 |               |
|        |                                           |     |     |      | 528.35  | 1582.03 | 1580.77 | 1.26  | 0 | 43 | 0.0015   | K.ISNGLCLSLNPHVDR.L               |               |
|        |                                           |     |     |      | 839.15  | 1676.28 | 1676.85 | -0.56 | 0 | 78 | 2.7e-007 | K.IIEECMILANVSAAK.F               |               |
|        |                                           |     |     |      | 608.79  | 1823.35 | 1822.87 | 0.48  | 1 | 27 | 0.031    | R.FHVDSGMAFIADDKR.I               | Oxidation (M) |
|        |                                           |     |     |      | 637.90  | 1910.68 | 1910.88 | -0.20 | 0 | 85 | 9.6e-008 | R.DFDDAVYAEVKPSGGW.R.L            |               |
|        |                                           |     |     |      | 961.10  | 1920.18 | 1920.97 | -0.78 | 0 | 65 | 4e-006   | R.GNSVYFPPSQVIPMLPEK.I            |               |
|        |                                           |     |     |      | 680.33  | 2037.95 | 2039.07 | -1.12 | 0 | 56 | 2.9e-005 | R.LIGEHTGGQVYQVGDVPTVK.V          |               |
|        |                                           |     |     |      | 700.58  | 2098.71 | 2099.03 | -0.32 | 0 | 91 | 2.6e-008 | R.GAIAFETIETQFIFNDQR.K            |               |
|        |                                           |     |     |      | 754.81  | 2261.42 | 2262.02 | -0.60 | 0 | 39 | 0.0013   | K.EGYGFFKPDDEGDDLFIISR.D          |               |
| S02427 | TonB-dependent receptor                   | 566 | 92  | 24.0 | 453.73  | 905.44  | 905.50  | -0.06 | 0 | 30 | 0.044    | K.LTGEFALR.L                      |               |
|        |                                           |     |     |      | 558.71  | 1115.41 | 1114.58 | 0.83  | 0 | 33 | 0.016    | K.VIDANGNWVK.R                    |               |
|        |                                           |     |     |      | 656.18  | 1310.35 | 1310.59 | -0.24 | 0 | 51 | 0.00024  | R.IYNQD'TD'TWR.L                  |               |
|        |                                           |     |     |      | 698.76  | 1395.50 | 1395.75 | -0.24 | 0 | 37 | 0.0035   | R.SNQLAAQPAQIK.L                  |               |
|        |                                           |     |     |      | 799.64  | 1597.27 | 1597.80 | -0.53 | 0 | 33 | 0.0087   | K.IGLTYATDEL'MVR.T                | Oxidation (M) |
|        |                                           |     |     |      | 625.90  | 1874.69 | 1874.93 | -0.24 | 0 | 67 | 6.8e-006 | R.QD'METASPVTVIDAAAIA.K.A         | Oxidation (M) |
|        |                                           |     |     |      | 734.86  | 2201.56 | 2202.07 | -0.51 | 0 | 48 | 0.00048  | R.VQDPTAGCLTL'DQGMIDAGIKA         |               |
|        |                                           |     |     |      | 738.65  | 2212.92 | 2213.94 | -1.02 | 0 | 29 | 0.042    | R.TETYDYSNDVYFQTPSER.R            |               |
|        |                                           |     |     |      | 1146.42 | 2290.83 | 2292.00 | -1.17 | 0 | 77 | 3.9e-007 | R.SMTDVYTDYDANDNPFVAVR.G          |               |
|        |                                           |     |     |      | 775.74  | 2324.18 | 2323.97 | 0.22  | 0 | 77 | 4.8e-007 | K.FEQDGENYGTIDGN'MGAYAR.V         | Oxidation (M) |
|        |                                           |     |     |      | 790.79  | 2369.35 | 2370.04 | -0.69 | 1 | 25 | 0.072    | K.RTETYDYSNDVYFQTPSER.R           |               |
|        |                                           |     |     |      | 803.16  | 2406.46 | 2406.15 | 0.31  | 0 | 50 | 0.0001   | R.MVNSGSGADSAVDLNSIPVAM'JAR.V     | Oxidation (M) |
| S00432 | aconitate hydratase 2, AcnB               | 483 | 94  | 17.0 | 1003.72 | 3008.13 | 3008.47 | -0.34 | 0 | 53 | 0.00013  | K.NLTDEKPLYVTNGSDAGTVPQVYD'TVGR.T |               |
|        |                                           |     |     |      | 599.25  | 1196.49 | 1196.53 | -0.04 | 0 | 26 | 0.071    | K.WMIAEGYDGR.R                    |               |
|        |                                           |     |     |      | 615.29  | 1228.56 | 1228.69 | -0.13 | 0 | 56 | 4.7e-005 | R.VLEIEGLESK.V                    |               |
|        |                                           |     |     |      | 629.76  | 1257.50 | 1257.66 | -0.16 | 0 | 33 | 0.0099   | R.IPPGVDEAAVKA                    |               |
|        |                                           |     |     |      | 727.18  | 1452.35 | 1452.75 | -0.40 | 0 | 66 | 9.5e-006 | R.DGIEPDVAGSVGPIK.K               |               |
|        |                                           |     |     |      | 734.71  | 1467.40 | 1468.71 | -1.31 | 0 | 52 | 0.00013  | R.LPTVEEYQ'EYAK.E                 |               |
|        |                                           |     |     |      | 776.13  | 1550.24 | 1550.72 | -0.48 | 0 | 93 | 1e-008   | K.VEQAFELSDASAERS                 |               |
|        |                                           |     |     |      | 824.11  | 1646.21 | 1646.76 | -0.55 | 0 | 86 | 6.2e-008 | K.DQLTEEGYGFGR.V                  |               |
|        |                                           |     |     |      | 855.19  | 1708.37 | 1708.88 | -0.51 | 0 | 92 | 1.8e-008 | K.GFPLVYVGDVVGTSRR.K              |               |
|        |                                           |     |     |      | 742.56  | 2224.65 | 2223.15 | 1.50  | 0 | 67 | 5.8e-006 | K.LVQNPPAGEEAFVLDLLENR.I          |               |
|        |                                           |     |     |      | 836.08  | 2505.23 | 2506.27 | -1.04 | 0 | 29 | 0.028    | K.IAIPFNTM'EDAGALFIELDVSK.M       | Oxidation (M) |
| S00424 | pyruvate dehydrogenase, E1 component, A   | 327 | 100 | 12.0 | 516.76  | 1031.51 | 1032.54 | -1.03 | 0 | 35 | 0.0062   | R.YW'DPLLAR.D                     |               |
|        |                                           |     |     |      | 596.76  | 1191.51 | 1191.59 | -0.08 | 0 | 85 | 6.2e-008 | R.LSE'DQLANFR.Q                   |               |
|        |                                           |     |     |      | 617.23  | 1232.44 | 1232.64 | -0.20 | 0 | 62 | 1e-005   | K.IIELEGEFR.G                     |               |
|        |                                           |     |     |      | 639.25  | 1276.49 | 1276.66 | -0.16 | 0 | 75 | 7.4e-007 | K.FSEEEVPSLKI                     |               |
|        |                                           |     |     |      | 654.23  | 1306.45 | 1305.67 | 0.79  | 0 | 52 | 8.7e-005 | K.IFDSILQSGNGR.E                  |               |
|        |                                           |     |     |      | 801.61  | 1601.20 | 1602.73 | -1.54 | 0 | 76 | 4.5e-007 | K.YVPQSDSQVAYYR.E                 |               |
|        |                                           |     |     |      | 786.79  | 2357.34 | 2358.14 | -0.81 | 0 | 24 | 0.1      | K.QAYISQVISSDAPAIAATDYMK.I        | Oxidation (M) |
|        |                                           |     |     |      | 1004.03 | 3009.08 | 3010.42 | -1.35 | 0 | 27 | 0.045    | R.FNIPIDQLEDL'PFYHPGDSEEVK.Y      |               |
| S01521 | respiratory FAD-dependent D-lactate dehy  | 177 | 103 | 9.0  | 570.75  | 1139.48 | 1139.62 | -0.14 | 0 | 32 | 0.011    | K.IGPDPATIASAK.I                  |               |
|        |                                           |     |     |      | 625.27  | 1248.53 | 1248.64 | -0.11 | 0 | 61 | 1.4e-005 | K.ITGDGITNALMK.T                  | Oxidation (M) |
|        |                                           |     |     |      | 675.65  | 1349.29 | 1349.60 | -0.32 | 0 | 45 | 0.00055  | R.FAWSTDASYFR.I                   |               |
|        |                                           |     |     |      | 753.76  | 1505.51 | 1505.79 | -0.28 | 0 | 53 | 0.00011  | K.IPVLDALSCTYR.T                  |               |
|        |                                           |     |     |      | 635.88  | 1904.63 | 1904.88 | -0.25 | 0 | 52 | 0.0002   | R.ADDAQ'TLEHYTQDV'TAK.L           |               |
|        |                                           |     |     |      | 812.40  | 2434.17 | 2433.17 | 1.00  | 0 | 24 | 0.085    | K.LAGFDFIRPMEFSTNPAVYDK.Y         | Oxidation (M) |
| S03193 | polysaccharide biosynthesis/export protei | 151 | 100 | 4.0  | 713.21  | 1424.40 | 1424.77 | -0.38 | 0 | 45 | 0.00056  | R.AGAGIQVVGVDGQVRL                |               |
|        |                                           |     |     |      | 754.72  | 1507.43 | 1507.76 | -0.33 | 0 | 81 | 2.1e-007 | K.MLANLFDDAELLK.L                 | Oxidation (M) |
|        |                                           |     |     |      | 776.68  | 1551.35 | 1551.77 | -0.42 | 0 | 72 | 1.4e-006 | K.VIVFNFSDDVQNR.F                 |               |
| S02907 | TonB-dependent receptor domain protein    | 120 | 96  | 4.0  | 542.73  | 1083.44 | 1083.52 | -0.08 | 0 | 43 | 0.00072  | K.TFDGLAFDAK.F                    |               |
|        |                                           |     |     |      | 602.79  | 1203.57 | 1204.65 | -1.07 | 0 | 83 | 2e-007   | R.YEALDNLVLR.A                    |               |
|        |                                           |     |     |      | 767.39  | 2299.15 | 2299.98 | -0.83 | 0 | 38 | 0.0045   | K.AGSACGFNFHDGTDYLPDQTK.D         |               |

| B2     |                         | Mascot Score | Mass (kDa) | Coverage | Observed m/z | Mr(expt) | Mr(calc) | Delta | Miss | Score | Expect   | Peptide           | Var_Mod       |
|--------|-------------------------|--------------|------------|----------|--------------|----------|----------|-------|------|-------|----------|-------------------|---------------|
| S01126 | chaperone protein, DnaK | 490          | 69         | 23.0     | 613.24       | 1224.47  | 1224.64  | -0.17 | 0    | 51    | 0.00027  | R.LINYLADDEFK.K   |               |
|        |                         |              |            |          | 620.25       | 1238.48  | 1238.63  | -0.15 | 0    | 61    | 1.1e-005 | K.VQEAVTNFFGK.E   |               |
|        |                         |              |            |          | 649.67       | 1297.33  | 1298.69  | -1.36 | 0    | 43    | 0.0014   | K.MAPPQVSAEILK.K  | Oxidation (M) |
|        |                         |              |            |          | 650.28       | 1298.54  | 1298.74  | -0.20 | 0    | 45    | 0.00042  | K.LESLVEDLIIR.T   |               |
|        |                         |              |            |          | 660.27       | 1318.52  | 1318.68  | -0.16 | 0    | 71    | 1.7e-006 | K.IEAAMSAVETAVK.G |               |

|        |                                             |     |    |      |         |         |         |       |   |     |          |                                 |               |
|--------|---------------------------------------------|-----|----|------|---------|---------|---------|-------|---|-----|----------|---------------------------------|---------------|
|        |                                             |     |    |      | 758.66  | 1515.30 | 1515.73 | -0.43 | 0 | 79  | 3.9e-007 | K.IIAADNGDAWVESR.G              |               |
|        |                                             |     |    |      | 782.72  | 1563.42 | 1563.80 | -0.38 | 0 | 41  | 0.002    | R.QAVTNPNNTFFAIK.R              |               |
|        |                                             |     |    |      | 804.60  | 1607.19 | 1607.75 | -0.55 | 0 | 54  | 6e-005   | K.ASSGLEEEVAQMVR.D              | Oxidation (M) |
|        |                                             |     |    |      | 806.66  | 1611.32 | 1612.82 | -1.51 | 0 | 63  | 9.9e-006 | K.SLGFNLDGIEPAPR.G              |               |
|        |                                             |     |    |      | 830.16  | 1658.31 | 1658.89 | -0.58 | 0 | 89  | 2.3e-008 | R.IINEPTAAALAYGIDK.K            |               |
| S01776 | outer membrane protein, MtrB                | 450 | 78 | 13.0 | 1060.09 | 2118.17 | 2119.07 | -0.90 | 0 | 34  | 0.0067   | R.TTPSHIAYTDEETIVGQPAK.R        |               |
|        |                                             |     |    |      | 626.69  | 1251.37 | 1251.54 | -0.17 | 0 | 47  | 0.00034  | R.LTGSYDYDDR.D                  |               |
|        |                                             |     |    |      | 677.69  | 1353.36 | 1353.64 | -0.28 | 0 | 37  | 0.0035   | K.QGQYNNVNVYR.Q                 |               |
|        |                                             |     |    |      | 717.66  | 1433.32 | 1433.65 | -0.33 | 0 | 75  | 6.1e-007 | R.QGITGDYGDYFAK.V               |               |
|        |                                             |     |    |      | 728.14  | 1454.27 | 1454.65 | -0.38 | 0 | 65  | 8.6e-006 | R.ASVDAYQLGMDGGR.L              |               |
|        |                                             |     |    |      | 772.15  | 1542.29 | 1542.68 | -0.39 | 0 | 84  | 7.2e-008 | R.VNSFDTWDMWVK.G                |               |
|        |                                             |     |    |      | 952.09  | 1902.16 | 1902.91 | -0.75 | 0 | 74  | 6.3e-007 | R.YALDDYDTTVIGLTESK.D           |               |
| S01779 | Decaheme cytochrome c, OmcA                 | 410 | 80 | 12.0 | 1034.48 | 2066.95 | 2067.99 | -1.04 | 0 | 69  | 1.5e-006 | R.ILTGQMSQDQALVTDNRY.Y          | Oxidation (M) |
|        |                                             |     |    |      | 468.32  | 934.63  | 934.49  | 0.14  | 0 | 43  | 0.00096  | K.VPTSAWKA                      |               |
|        |                                             |     |    |      | 483.33  | 964.65  | 964.50  | 0.15  | 0 | 26  | 0.043    | R.AWLYGDIK.N                    |               |
|        |                                             |     |    |      | 543.85  | 1085.68 | 1085.62 | 0.06  | 0 | 100 | 1.8e-009 | K.SNVVTGIALGR.S                 |               |
|        |                                             |     |    |      | 629.31  | 1256.60 | 1256.59 | 0.00  | 0 | 59  | 2.7e-005 | K.EFISDPSAYTK.S                 |               |
|        |                                             |     |    |      | 650.80  | 1299.58 | 1299.62 | -0.05 | 0 | 54  | 6e-005   | R.YAYIQDQPR.F                   |               |
| S03669 | TonB-dependent haem/haemoglobin recep       | 335 | 76 | 22.0 | 670.78  | 1339.55 | 1339.66 | -0.12 | 0 | 62  | 1.3e-005 | K.TFTDSTNSNLK.L                 |               |
|        |                                             |     |    |      | 522.26  | 1042.50 | 1042.51 | -0.01 | 0 | 27  | 0.039    | K.LTYGVDGYR.D                   |               |
|        |                                             |     |    |      | 658.20  | 1314.39 | 1314.62 | -0.23 | 0 | 44  | 0.00067  | R.GSYFMDPELLK.S                 |               |
|        |                                             |     |    |      | 675.22  | 1348.42 | 1348.65 | -0.23 | 0 | 71  | 1.3e-006 | R.VDFAIENIGDEK.Y                |               |
|        |                                             |     |    |      | 725.17  | 1448.32 | 1448.71 | -0.39 | 0 | 66  | 5.6e-006 | K.GLCNTFATNPNLK.S               |               |
|        |                                             |     |    |      | 830.14  | 1658.26 | 1658.86 | -0.60 | 0 | 52  | 0.00012  | R.TVGINLNSSQLGNTK.L             |               |
|        |                                             |     |    |      | 929.09  | 1856.17 | 1856.89 | -0.72 | 0 | 28  | 0.023    | K.SAQDFLAPNETFGYLK.Q            |               |
|        |                                             |     |    |      | 943.57  | 1885.12 | 1885.94 | -0.83 | 0 | 51  | 0.00012  | R.VTYVASQNTPTGYSVAK.Y           |               |
|        |                                             |     |    |      | 636.92  | 1907.73 | 1907.90 | -0.18 | 0 | 39  | 0.0016   | R.NDVDDFIVQVSNPYR.G             |               |
| S01778 | Decaheme cytochrome c, MtrC                 | 332 | 72 | 10.0 | 722.55  | 2164.64 | 2165.05 | -0.41 | 0 | 74  | 5e-007   | K.SAEQGVVETEFDEVLVSATR.L        |               |
|        |                                             |     |    |      | 806.79  | 2417.36 | 2418.16 | -0.79 | 0 | 39  | 0.0014   | K.GQVGRPEDIDGETTVWGAFTRA        |               |
|        |                                             |     |    |      | 547.26  | 1092.51 | 1092.58 | -0.07 | 0 | 71  | 1.3e-006 | K.ADLAFATLSGKA                  |               |
|        |                                             |     |    |      | 726.71  | 1451.40 | 1451.71 | -0.32 | 0 | 103 | 1e-009   | K.ETLESFGAVVDGTDK.D             |               |
|        |                                             |     |    |      | 878.06  | 1754.10 | 1754.78 | -0.68 | 0 | 96  | 3.6e-009 | K.FVDCADPAFDGVDVTK.Y            |               |
| S00314 | ornithine decarboxylase, SpeF               | 291 | 82 | 14.0 | 957.05  | 2868.13 | 2868.31 | -0.18 | 0 | 27  | 0.045    | K.LADGTTVPVAEMVEDFDGQGNAPQYTK.N | Oxidation (M) |
|        |                                             |     |    |      | 467.77  | 933.53  | 933.49  | 0.04  | 0 | 38  | 0.0033   | K.GDLVLFDR.N                    |               |
|        |                                             |     |    |      | 564.70  | 1127.39 | 1127.53 | -0.14 | 0 | 29  | 0.04     | R.FFEFEPGQK.W                   |               |
|        |                                             |     |    |      | 709.70  | 1417.38 | 1416.69 | 0.69  | 0 | 72  | 1.5e-006 | K.TYFVLNLTSSSNK.V               |               |
|        |                                             |     |    |      | 731.72  | 1461.43 | 1461.77 | -0.34 | 0 | 63  | 7.6e-006 | K.FLLTTPGIDAETGKY               |               |
|        |                                             |     |    |      | 755.71  | 1509.41 | 1509.82 | -0.40 | 0 | 40  | 0.0014   | R.GNVELVPLSQIEGR.I              |               |
|        |                                             |     |    |      | 781.16  | 1560.31 | 1560.76 | -0.46 | 0 | 76  | 4.7e-007 | K.VMDPQEANLEFIR.G               |               |
|        |                                             |     |    |      | 812.19  | 1622.36 | 1622.87 | -0.51 | 0 | 28  | 0.046    | K.YEQALLPPFFGTLK.K              |               |
| S00021 | fatty oxidation complex, alpha subunit, Fad | 188 | 77 | 15.0 | 734.19  | 2199.55 | 2199.11 | 0.44  | 0 | 45  | 0.00097  | K.LVDEADPLSEVLPNVYNANK.A        |               |
|        |                                             |     |    |      | 560.24  | 1118.47 | 1119.56 | -1.08 | 0 | 38  | 0.0056   | K.AFDADEIHAR.T                  |               |
|        |                                             |     |    |      | 701.24  | 1400.47 | 1400.76 | -0.29 | 0 | 46  | 0.00037  | K.LEDLPPPTASAIK.G               |               |
|        |                                             |     |    |      | 723.75  | 1445.48 | 1445.76 | -0.28 | 0 | 74  | 8.6e-007 | R.ETLASLDAALDSIK.Q              |               |
|        |                                             |     |    |      | 819.66  | 1637.30 | 1637.86 | -0.56 | 0 | 45  | 0.00051  | K.DIAQPALDLGLNEAAK.L            |               |
|        |                                             |     |    |      | 621.96  | 1862.87 | 1863.88 | -1.02 | 0 | 25  | 0.096    | R.GEHSSEETIASVVAYASK.M          |               |
|        |                                             |     |    |      | 662.93  | 1985.77 | 1985.98 | -0.21 | 0 | 28  | 0.052    | R.VIGADNALEWITTGNEQRA           |               |
| S02402 | ribosomal protein S1, RpsA                  | 178 | 61 | 17.0 | 736.89  | 2207.64 | 2209.20 | -1.57 | 0 | 42  | 0.002    | K.VGAVDVAVPAEALVAAIQMLK.D       | Oxidation (M) |
|        |                                             |     |    |      | 616.71  | 1231.41 | 1231.61 | -0.20 | 0 | 26  | 0.044    | K.SESPAPAEQFK.N                 |               |
|        |                                             |     |    |      | 707.69  | 1413.36 | 1413.71 | -0.35 | 0 | 57  | 3.9e-005 | K.QLGEDPWLEISK.R                |               |
|        |                                             |     |    |      | 764.21  | 1526.41 | 1526.79 | -0.39 | 0 | 68  | 4.9e-006 | R.DALLENLQEGQAVK.G              |               |
|        |                                             |     |    |      | 797.40  | 1592.78 | 1591.81 | 0.97  | 0 | 27  | 0.044    | K.AYEDAETVIGIINGK.V             |               |
|        |                                             |     |    |      | 813.60  | 1625.19 | 1625.72 | -0.53 | 0 | 42  | 0.001    | K.QTEDDPFNAYLADK.K              |               |
|        |                                             |     |    |      | 820.16  | 1638.30 | 1638.76 | -0.46 | 0 | 23  | 0.079    | K.QEDAVISNAAEAFKA               |               |
| S03844 | oligopeptidase lipoprotein, M13 family      | 141 | 77 | 8.0  | 884.04  | 1766.07 | 1766.86 | -0.79 | 0 | 31  | 0.018    | R.IEDASTVYVSGDAIEAK.F           |               |
|        |                                             |     |    |      | 685.23  | 1368.45 | 1367.78 | 0.67  | 0 | 43  | 0.0013   | R.GVAAVNGVLGEVVGK.V             |               |
|        |                                             |     |    |      | 685.73  | 1369.45 | 1369.68 | -0.23 | 0 | 50  | 0.00014  | K.EAPVIDGLTGDQR.F               |               |
|        |                                             |     |    |      | 713.72  | 1425.43 | 1425.68 | -0.25 | 0 | 82  | 1.1e-007 | K.ALGSIEFENFDK.S                |               |
|        |                                             |     |    |      | 709.54  | 2125.59 | 2126.07 | -0.49 | 0 | 38  | 0.0027   | K.AIEEVAATPNLVEGTDEQK.V         |               |
| S03033 | ferric alcaligin siderophore receptor, FauA | 140 | 78 | 7.0  | 560.80  | 1119.58 | 1119.58 | 0.00  | 0 | 47  | 0.00087  | R.IDASYIDPVK.G                  |               |



|        |                                            |     |    |     |        |         |         |       |   |    |          |                              |               |
|--------|--------------------------------------------|-----|----|-----|--------|---------|---------|-------|---|----|----------|------------------------------|---------------|
| SO2912 | pyruvate formate-lyase, PflB               | 129 | 85 | 8.0 | 585.77 | 1169.52 | 1169.67 | -0.15 | 0 | 35 | 0.0049   | K.DIEIINVVGAK.D              | Oxidation (M) |
|        |                                            |     |    |     | 744.71 | 1487.41 | 1487.80 | -0.38 | 0 | 47 | 0.00034  | R.TGDVLPGTTPVYRE             |               |
|        |                                            |     |    |     | 902.12 | 1802.22 | 1802.85 | -0.62 | 0 | 80 | 2.6e-007 | R.FNYGDNLIDTAIYER.V          |               |
|        |                                            |     |    |     | 643.38 | 1284.74 | 1284.68 | 0.06  | 0 | 25 | 0.08     | R.VALYGIDFLMK.D              |               |
|        |                                            |     |    |     | 652.70 | 1303.38 | 1303.61 | -0.22 | 0 | 30 | 0.031    | R.VDDIACDLVER.F              |               |
| SO2492 | oxidoreductase, acyl-CoA dehydrogenase fa  | 128 | 84 | 4.0 | 653.23 | 1304.45 | 1304.67 | -0.22 | 0 | 65 | 5.1e-006 | K.SGVLTLPLDAYGR.G            |               |
|        |                                            |     |    |     | 672.23 | 1342.44 | 1342.68 | -0.24 | 0 | 30 | 0.034    | R.TSSFLDIYIER.D              |               |
|        |                                            |     |    |     | 806.66 | 1611.32 | 1611.87 | -0.56 | 0 | 32 | 0.013    | K.DLETIVGLQTDAPLK.R          |               |
|        |                                            |     |    |     | 567.83 | 1133.64 | 1133.65 | -0.01 | 0 | 29 | 0.023    | K.EGFFALIIPK.K               |               |
|        |                                            |     |    |     | 646.26 | 1290.50 | 1290.65 | -0.15 | 0 | 62 | 1.1e-005 | R.GEFNGEEVLGLK.L             |               |
| SO1209 | polyribonucleotide nucleotidyltransferase, | 124 | 76 | 8.0 | 681.75 | 1361.49 | 1361.73 | -0.24 | 0 | 60 | 1.6e-005 | R.IIANTYQLEAAR.R             |               |
|        |                                            |     |    |     | 608.75 | 1215.49 | 1215.63 | -0.14 | 0 | 26 | 0.044    | R.EVDNLLGSLEK.K              |               |
|        |                                            |     |    |     | 698.74 | 1395.47 | 1395.74 | -0.27 | 0 | 79 | 2e-007   | K.EALLAANPDVDLR.E            |               |
|        |                                            |     |    |     | 750.70 | 1499.38 | 1499.73 | -0.35 | 0 | 34 | 0.0067   | R.DFFPLTVNYQEK.T             |               |
|        |                                            |     |    |     | 899.36 | 2695.06 | 2696.18 | -1.12 | 0 | 51 | 0.00019  | K.EGDDFVVLSDILGDEDHLGDMDFK.V |               |
| SO4743 | TonB-dependent receptor                    | 101 | 77 | 4.0 | 787.10 | 1572.18 | 1572.69 | -0.52 | 0 | 64 | 1.2e-005 | R.NLFDTEYLDGGSDK.M           | Oxidation (M) |
|        |                                            |     |    |     | 852.63 | 1703.26 | 1703.83 | -0.57 | 0 | 58 | 2.4e-005 | R.LDSAPSLIEGSEDPFK.D         |               |
|        |                                            |     |    |     | 642.27 | 1282.53 | 1282.68 | -0.15 | 0 | 73 | 6.7e-007 | R.VLEDGVFYTLK.E              |               |
| SO3142 | peptidyl-dipeptidase, Dcp_1                | 97  | 80 | 3.0 | 676.66 | 1351.31 | 1352.69 | -1.39 | 0 | 46 | 0.00078  | K.VTYPSLSGTSVSR.D            |               |
| SO2629 | isocitrate dehydrogenase, NADP-dependen    | 76  | 81 | 4.0 | 704.19 | 1406.37 | 1406.64 | -0.26 | 0 | 31 | 0.016    | K.GYDIPNYPDEPK.T             |               |
|        |                                            |     |    |     | 916.09 | 1830.17 | 1830.94 | -0.77 | 0 | 66 | 3.1e-006 | K.TFEIPADGVVNVIDASGK.V       |               |

| B3     |                                      |              |            |          |              |          |          |       |      |       |          |                          |         |
|--------|--------------------------------------|--------------|------------|----------|--------------|----------|----------|-------|------|-------|----------|--------------------------|---------|
| Gene   | Annotation                           | Mascot Score | Mass (kDa) | Coverage | Observed m/z | Mr(expt) | Mr(calc) | Delta | Miss | Score | Expect   | Peptide                  | Var_Mod |
| TRPGTR | Trypsin precursor                    | 205          | 25         | 20.0     | 421.87       | 841.72   | 841.50   | 0.22  | 0    | 44    | 0.05     | R.VATVSLPR.S             |         |
|        |                                      |              |            |          | 737.45       | 2209.32  | 2210.10  | -0.78 | 0    | 110   | 6.6e-009 | R.LGEHNIDVLEGNEQFINAAK.I |         |
|        |                                      |              |            |          | 761.57       | 2281.69  | 2282.17  | -0.48 | 0    | 75    | 2.6e-005 | K.IIHPNFNGNTLDNDIMLIK.L  |         |
| I46732 | IG gamma heavy chain constant region | 171          | 21         | 13.0     | 601.77       | 1201.53  | 1201.61  | -0.08 | 0    | 77    | 2.3e-005 | K.LSVPTSEWQR.G           |         |
|        |                                      |              |            |          | 817.71       | 1633.40  | 1633.89  | -0.49 | 0    | 71    | 8.4e-005 | R.VVSTLPIAHQDWLR.G       |         |
|        |                                      |              |            |          | 601.77       | 1201.53  | 1201.61  | -0.08 | 0    | 77    | 2.3e-005 | K.LSVPTSEWQR.G           |         |
| GHRB   | IG gamma chain C region              | 145          | 36         | 9.0      | 1131.09      | 2260.17  | 2260.15  | 0.02  | 0    | 45    | 0.034    | K.GYLPEPVTVTWNSGLTNGVR.T |         |
